# 1 Knowledge, attitude and practices on dengue fever 2 among paediatric and adult in-patients in Metro 3 Manila, Philippines

4  
5 Von Ralph Dane M. Herbuela<sup>1</sup>, Ferdinand S. de Guzman<sup>2</sup>, Girly D. Sobrepeña<sup>3</sup>,  
6 Andrew Benedict F. Claudio<sup>4</sup>, Angelica Cecilia V. Tomas<sup>5</sup>, Carmina M. Arriola-delos Reyes<sup>5</sup>,  
7 Rachele A. Regalado<sup>6</sup>, Mariama M. Teodoro<sup>7</sup> and Kozo Watanabe<sup>1, 8,\*</sup>  
8

9 <sup>1</sup> Graduate School of Science and Engineering, Ehime University, Bunkyo-cho 3, Matsuyama, Ehime, 790-8577,  
10 Japan

11 <sup>2</sup> Department of Family and Community Medicine, Infectious Diseases and Tropical Medicine, San Lazaro  
12 Hospital, Manila, 1003, Philippines

13 <sup>3</sup> Paediatrics Department, Quezon City General Hospital, Quezon City, 1106, Philippines

14 <sup>4</sup> Office of Nursing Service, Pasay City General Hospital, Pasay City, 1300, Philippines

15 <sup>5</sup> Department of Paediatrics, College of Medicine, University of the Philippines, Manila, 1000, Philippines

16 <sup>6</sup> Guidance Department, University of Santo Tomas - Angelicum College, Quezon City, 1114, Philippines

17 <sup>7</sup> Counselling and Educational Psychology Department, De La Salle University, Manila, 1004, Philippines

18 <sup>8</sup> Biological Control Research Unit, Centre for Natural Science and Environmental Research, De La Salle University,  
19 Manila, 1004, Philippines

20 \*watanabe\_kozo@cee.ehime-u.ac.jp  
21

## 22 **ABSTRACT**

23 Knowledge, attitude and practice (KAP) studies have included mainly community-based samples, yet, investigation on in-  
24 patients with Dengue through hospital-based surveillance has not been done. This study aimed to assess and compare the  
25 KAP, identify its determinants and protective factors among 250 clinically or serologically confirmed paediatric (n = 233) and  
26 adult patients (n = 17) with DF and 250 youth (n = 233) and adult (n = 17) controls. Paediatric patients with DF had significantly  
27 higher knowledge and practice mean scores than adult patients with DF and lower practice mean scores than youth controls.  
28 Being senior high school, days in the hospital and rash determined increased KAP among paediatric patients with DF.  
29 Mosquito-eating fish, screen windows and Dengue vaccine were protective factors against DF, though, further studies should  
30 confirm these results. Moreover, there was a significant positive correlation between knowledge and attitude of paediatric  
31 patients with DF, however, similar with adult patients with DF, these domains did not correlate with their practices against  
32 DF. This suggests that the translation of knowledge and attitude to better practices against DF was poor. Thus, it is necessary  
33 to structure health programs on models that facilitate behavioural change among children and adults.  
34

## 35 **Introduction**

36 To date, there has been no known cure for Dengue Fever (DF), the world's fastest spreading mosquito-  
37 borne disease which causes approximately 390 million cases per year and puts an estimated 3.9 billion people  
38 at risk in 128 countries<sup>1-3</sup>. Since DF epidemiology and ecology are strongly associated with human habits and  
39 activities<sup>4</sup>, few community-based studies have been done to assess the knowledge, attitude and practices (KAP)  
40 of people on DF.

41 Several community-based KAP studies have investigated the correlation among KAP domains. Harapan  
42 et al.<sup>5</sup> reported that good knowledge is positively associated with good practice. This is parallel to the report by  
43 Alyousefi et al.<sup>6</sup> that poor knowledge on DF has significant positive association with poor preventive practices.  
44 However, other similar studies had different results. Kumaran et al.<sup>7</sup> and Shuaib et al.<sup>8</sup> reported that knowledge  
45 on causes, signs, symptoms, mode of transmission and preventive practices against DF is not correlated with the  
46 practice of preventive measures against DF. Aside from these, two case-control studies reported which  
47 preventive practices are protective factors against DF. Regression models revealed that removing trash and  
48 stagnant water from around the residence, using mosquito repellent oils, use of mosquito bed nets, fumigation  
49 inside the house, and piped water inside the house can reduce the risk and vulnerability to DF infection<sup>9,10</sup>.

50 Most of the KAP studies have included only community-based samples and investigation on hospital-  
51 based samples with clinical or serologically-confirmed DF diagnosis has not been done. Chen et al.<sup>9</sup> interviewed  
52 patients who were randomly sampled from a web-based reporting system through telephone interviews.  
53 However, this method limits the collection to individuals and households with telephones. It also had 50%  
54 response and completion rate among respondents<sup>10, 11</sup>. On the other hand, face to face interview with

55 questionnaire would obtain good response and acceptance rate (99%) and a low refusal rate (1%) among in- and  
56 out-patients<sup>11, 12</sup>. Kenneson et al.<sup>10</sup> also did clinical ascertainment and community screening to interview  
57 households with and without DF infections by identifying acute or recent DF infections. However, the data  
58 collected among households with acute or recent DF infections suggested self-report bias, as members of these  
59 households may have already acquired knowledge, changed their behaviour or attitude towards DF during their  
60 surveillance<sup>10</sup>. Therefore, hospital-based surveillance, compared with community-based surveillance, would  
61 allow us to capture patients' and their family's KAP during hospitalization (acute phase [febrile-critical] of the  
62 infection [2-7 days] from the onset of fever<sup>1</sup>).

63 Previous KAP studies have also reported that sociodemographic data like income, employment,  
64 education, marital status, religion, sex, age, location, socio-economic status, type of residence and DF history  
65 were associated with KAP<sup>5, 8, 13-21</sup>. However, to our knowledge, no study has investigated the association  
66 between clinical parameters (e.g. diagnosis, platelet count, DF history), clinical symptoms (e.g. fever, rash,  
67 abdominal pain) and KAP, more so, the difference of determinants of KAP between children and adult patients  
68 with DF. Since adults exhibit higher incidence of the severe forms of DF compared with children<sup>22</sup>, clinical  
69 presentations of symptoms may also be significantly different between paediatric and adult patients with DF.  
70 Vomiting and skin rash were more prevalent among children while myalgia and arthralgia, nausea,  
71 thrombocytopenia were more exhibited by adult patients with DF<sup>22, 23</sup>.

72 Based on the literatures presented, we hypothesized that paediatric and adult patients' knowledge and  
73 attitude on DF would not have positive significant relationship with their practices against DF, compared with  
74 the youth and adult controls. We also hypothesized that paediatric and adult patients with DF may have different  
75 determinants of KAP by socio-demographic profile like age, gender, education and income. In addition, clinical  
76 symptoms as determinants of KAP will be different between paediatric and adult patients with DF. Vomiting and  
77 skin rash were prevalent among paediatric patients with DF while there was a preponderance of myalgia and  
78 arthralgia, nausea, thrombocytopenia among adult patients with DF. With all these, we hypothesized that  
79 paediatric and adult patients with DF would have lower levels of KAP domains than the youth and adult controls,  
80 which would also give us hints on which KAP domain have aggravated the acquisition of the disease. Therefore,  
81 this study aimed to assess and compare the KAP of paediatric patients and adult patients with DF and youth and  
82 adult controls. We also sought to identify the determinants of KAP domains by socio-demographic profiles,  
83 clinical parameters and symptoms, analyse the relationship among the KAP domains, and identify protective  
84 factors against DF.

## 85 86 **Results**

### 87 **Socio-demographic Profile, Clinical Parameters and Symptoms**

88 Initially, there were 350 patients with DF participated in the study. However, we have excluded those  
89 who had incomplete responses (n = 15, 4.3%) and those whose responses came from a family member instead  
90 of patient himself (n = 85, 24.3%). Thus, data from 500 participants comprising of 250 patients with DF  
91 (paediatrics n = 233 [93.2%]; adults n = 17 [6.8%]) and 250 controls (youth n = 233; adults n = 17) were included  
92 in the final analysis. Paediatric patients with DF had a mean (M) age of 13, and an SD ( $\pm$ ) of 3.16 years. All were  
93 single (100%), 56.7% were males, and 46.9% were in junior high school, 84% belong to a family with a monthly  
94 income of  $\leq$ 10,000 pesos. The age of adult patients ranges from 19 to 49 years old (M, 29.9 $\pm$ 10), 64.7% were  
95 females; 73.3% were single, 61.5% were employed, 70.6% belong to a family with a monthly income of  $\leq$ 10,000  
96 pesos and 70.6% belong to a family with  $\leq$ 5 members. All (100%) adult patients and majority (77.7%) of  
97 paediatric patients with DF had dengue with warning signs. A large proportion of paediatric patients and adult  
98 patients had no DF history (92.7% and 93.3%, respectively), had no family DF history (69% and 88.2%,  
99 respectively) and were in the acute (febrile-critical) phase of the infection (80.7% and 70.6%, respectively). More  
100 than half (68.2%) of paediatric patients and majority (88.2) of adult patients had thrombocytopenia (9,900/mm<sup>3</sup>).  
101 Nearly half (43%) of paediatric patients and 35.3% of adult patients had petechiae or rashes.

102 Furthermore, youth controls had a mean age of 14.11 ( $\pm$ 1.88) years with almost half (47.6%) belong to  
103 14-16 age group while adult controls had a mean age of 26.6 ( $\pm$ 6.07) years which range from 20 to 46 years old.  
104 Half (51.1%) of youth controls were males while 64.7% of adult controls were females. All (100%) of youth  
105 controls and majority (94.1%) of adult controls were single. Most of the youth (92.7%) and adult controls (93.8%)  
106 belong to a family with a monthly income of  $\geq$ 10,000 pesos. There was a preponderance of youth (86.7%) and  
107 adult (94.1%) controls who had no DF history. More than half of youth (79.4%) and adult controls (58.8%) had  
108 no family DF history. For more information on the profile of patients with DF and controls, please see  
109 Supplementary Table S1.

110  
111

112 **Prevalence of good knowledge, attitudes and practices**

113 An independent samples t-test revealed that paediatric patients obtained significantly higher mean  
 114 scores than adult patients in knowledge ( $P = 0.03$ ) and practice ( $P = 0.02$ ) domains as shown in **Figure 1**. In  
 115 control group, adult controls had significantly higher mean scores than youth controls in all domains: knowledge  
 116 ( $P < 0.001$ ), attitude ( $P < 0.001$ ) and practice ( $P = 0.02$ ). When we compared the mean scores of KAP domains  
 117 between paediatric patients with DF and youth controls, the former had significantly higher mean scores than  
 118 the latter in knowledge ( $P < 0.001$ ) and attitude ( $P < 0.001$ ) domains. As expected, paediatric patients with DF  
 119 obtained lower mean score than youth controls in practice domain ( $P = 0.03$ ) and adult patients with DF had  
 120 significantly lower mean scores than adult controls in knowledge ( $P < 0.001$ ) and practice ( $P < 0.001$ ) domains.  
 121  
 122  
 123

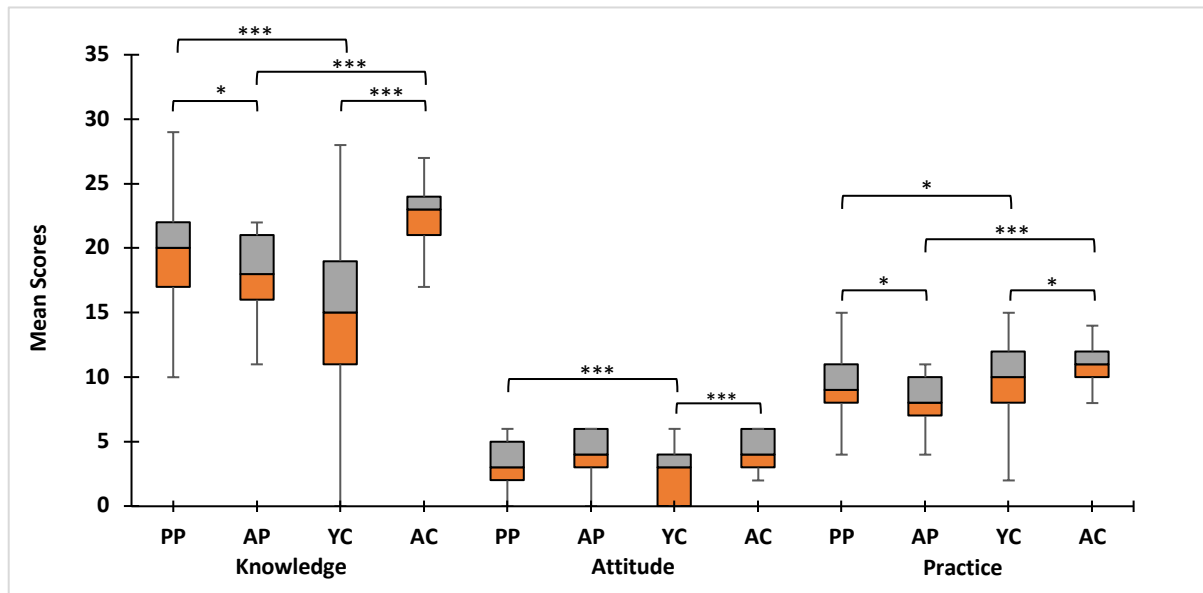

124  
 125 **Figure 1.** Independent t-test results for the difference of knowledge, attitude and practices domains mean  
 126 scores among paediatric and adult patients with DF and youth and adult controls. PP = Paediatric Patients, AP  
 127 = Adult Patients, YC = Youth Controls, AC = Adult Controls; \*  $P < 0.05$ ; \*\*  $P < 0.01$ ; \*\*\*  $P < 0.001$   
 128  
 129

130 **Determinants of knowledge, attitudes and practices**

131 Paediatric patients who were in senior high school, those who had DF history had high knowledge mean  
 132 scores, while youth controls who were females, those who were 17-18 years old, and those who were college  
 133 students had high knowledge mean scores as shown in **Table 1**. No significant determinants of high knowledge  
 134 mean scores were found among adult patients with DF and adult controls. Moreover, no significant  
 135 determinants of high attitude mean scores were found among paediatric patients with DF while being female,  
 136 those who were 17-18 years old, and those who were college students and those who had family DF history had  
 137 high attitude mean scores. Adult patients with DF who had petechiae or rashes and adult controls who were  
 138 males had higher attitude mean scores. Determinants of high mean scores in practice domain were income (less  
 139 than 10,000 pesos), probable DF diagnosis and having fever among paediatric patients with DF. Unexpectedly,  
 140 adult patients who had no retro-/ peri-orbital pain had high practice mean score. Lastly, age (17-18 years old)  
 141 was also a determinant of high practice mean scores among youth controls while no significant determinants of  
 142 high practice mean scores were found among adult controls.  
 143

144 Multivariate linear regression analysis found significant regression equations in all KAP domains among  
 145 paediatric patients with DF as shown in **Table 2**. It showed that knowledge increased significantly more in  
 146 paediatric patients with DF who were senior high school while it decreased significantly more in paediatric  
 147 patients who were in college and those who had DF for the first time. Being senior high school also tended to  
 148 increase paediatric patients' attitude. Then, as their days in the hospital increases, their attitude scores also  
 149 increase, however, as their age increases, their attitude score decreases. Further, practice scores tend to  
 decrease among those with severe dengue, however, it tends to increase to those paediatric patients who had

150 petechiae or rash. Age was found to increase knowledge, attitude and practice, being female increased both  
 151 knowledge and attitude and having family DF history increased attitude among youth controls. While no  
 152 significant determinants were found among adult patients with DF, being in college or university, being female  
 153 and being in a family with more than 5 members decreased attitude and being unemployed and having DF for  
 154 the first time, decreased practice among adult controls.  
 155  
 156

**Table 1.** Determinants of knowledge, attitude and practice among paediatric and adult patients with DF and youth and adult controls

| Outcome Variables | Socio-demographic, clinical parameters and clinical symptoms variables | Mean Scores                           |
|-------------------|------------------------------------------------------------------------|---------------------------------------|
| Knowledge         | Paediatric patients Education <sup>†</sup>                             |                                       |
|                   | Grade School/ Junior HS/ Senior HS/ College/ Employed                  | 19.4/ 19.6/ <b>21.0*</b> / 17.0/ 17.4 |
|                   | DF history                                                             |                                       |
|                   | Had DF/ first-time                                                     | <b>21.4*</b> /19.4                    |
|                   | Youth controls Gender                                                  |                                       |
|                   | Male/ female                                                           | 13.4/ <b>15.6**</b>                   |
| Attitude          | Age <sup>†</sup>                                                       |                                       |
|                   | 8-10/ 11-13/ 14-16/ 17-18                                              | 9.50/ 11.9/ 16.1/ <b>17.7**</b>       |
|                   | Education <sup>†</sup>                                                 |                                       |
|                   | Grade School/ Junior HS/ Senior HS/College                             | 10.5/ 14.3/ 18.2/ <b>19.7**</b>       |
|                   | Adult patients                                                         |                                       |
|                   | Petechiae or rash Asymptomatic/ Symptomatic                            | 3.18/ <b>5.17*</b>                    |
| Practice          | Youth controls Gender                                                  |                                       |
|                   | Male/ female                                                           | 2.09/ <b>2.85**</b>                   |
|                   | Age <sup>†</sup>                                                       |                                       |
|                   | 8-10/ 11-13/ 14-16/ 17-18                                              | 2.50/ 2.05/ 2.60/ <b>3.56**</b>       |
|                   | Education <sup>†</sup>                                                 |                                       |
|                   | Grade School/ Junior HS/ Senior HS/ College                            | 2.18/ 2.37/ 3.17/ <b>4.83*</b>        |
| Practice          | Adult patients                                                         |                                       |
|                   | Family DF history                                                      |                                       |
|                   | None/ ≥ 1 had DF                                                       | 2.26/ <b>3.25**</b>                   |
|                   | Adult controls                                                         |                                       |
|                   | Gender                                                                 |                                       |
|                   | Male/ female                                                           | 5.17/ <b>3.54*</b>                    |
| Practice          | Paediatric patients                                                    |                                       |
|                   | Income                                                                 |                                       |
|                   | ≤ 10,000 Php/ ≥ 11, 000 Php                                            | <b>9.40*</b> / 8.44                   |
|                   | Diagnosis <sup>†</sup>                                                 |                                       |
|                   | Dengue with ws / Severe Dengue/ Probable Fever                         | 9.09/ 7.50/ <b>10.3**</b>             |
|                   | Asymptomatic/ Symptomatic                                              | 9.09/ <b>10.0*</b>                    |
| Practice          | Adult patients                                                         |                                       |
|                   | Retro-/peri-orbital pain                                               |                                       |
|                   | Asymptomatic/ Symptomatic                                              | <b>8.33*</b> / 5.00                   |
| Practice          | Youth controls                                                         |                                       |
|                   | Age <sup>†</sup>                                                       |                                       |
|                   | 8-10/ 11-13/ 14-16/ 17-18                                              | 7.75/ 9.00/ 10.4/ <b>10.6**</b>       |

<sup>†</sup> Calculated using one-way ANOVA; HS = high School; ws = warning signs; DF = Dengue Fever; Highlighted mean scores are with significant p-values: \*P < 0.05, \*\*P < 0.01, \*\*\*P < 0.001.

157  
 158  
 159  
 160  
 161  
 162  
 163  
 164  
 165  
 166  
 167  
 168  
 169

### Correlation among knowledge, attitudes and practices

Spearman rank correlation revealed that there was a significant positive correlation between knowledge and attitude domains of paediatric patients with DF as shown in **Table 3**. However, as hypothesized, there was no correlation found in knowledge-practice and attitude-practice domains of both paediatric and adult patients with DF. Among controls, only youth controls had obtained significant positive correlations among the KAP domains, wherein a strong correlation was found between knowledge-practice domains with a correlation coefficient of 0.42 (95% CI: 0.34-0.57).

### Sources of information on DF

Television (TV) was the main source of information among patients with DF (75.2%) and controls (72%). Chi-square test analyses showed that paediatric and adult patients with DF were more likely to get information

170 on DF from hospital, doctors and nurses (68.8%,  $P < 0.001$ ) and health centres (64%,  $P < 0.001$ ), compared with  
 171 youth and adult controls. More than half of youth (60.5%) and adult controls (53%) identified social media (e.g.  
 172 Facebook, Twitter, Instagram etc.) (60%,  $P < 0.001$ ) and family members (63% and 59%,  $P < 0.001$ ) and school  
 173 (55.8% and 52.9%,  $P = 0.04$ ) as their sources of information about DF. Further analysis of mean score comparisons  
 174 using independent t-test found that paediatric and adult patients who reported to have obtained information  
 175 on DF through newspaper and health centre, respectively, had higher knowledge mean scores. In youth controls,  
 176 those who have obtained information on DF through social media, newspaper, health brochures, family  
 177 members, school, hospital, doctors and nurses and health centres had higher mean scores in knowledge domain.  
 178 Attitude and practice mean scores were higher among those paediatric patients with DF and youth controls who  
 179 had identified newspaper, health brochures, family, school, hospital, doctors and nurses, barangay and  
 180 community and health centres as their sources of information on DF. Adult controls who reported neighbours  
 181 as their source of information on DF also had high attitude mean scores and those who had high practice mean  
 182 scores reported barangay and community and workplace as their sources of information on DF. (Supplementary  
 183 Table S1).  
 184

185

**Table 2.** Multivariate linear regression results showing the determinants of knowledge, attitude and practice among paediatric and adult patients with DF

| Outcome Variables | Determinants        | R <sup>2</sup>                 | $\beta$ | p-value |         |
|-------------------|---------------------|--------------------------------|---------|---------|---------|
| Knowledge         | Paediatric patients | Education (senior high school) | 0.09    | 0.18    | 0.01    |
|                   |                     | Education (college)            |         | -0.16   | 0.02    |
|                   |                     | No DF history (first-time)     |         | -0.15   | 0.04    |
|                   | Youth controls      | Age                            | 0.18    | 0.38    | < 0.001 |
|                   |                     | Female                         |         | 0.19    | 0.002   |
| Attitude          | Paediatric patients | Age                            | 0.11    | -0.30   | 0.004   |
|                   |                     | Education (senior high school) |         | 0.39    | < 0.001 |
|                   |                     | Days in the hospital           |         | 0.16    | 0.04    |
|                   | Youth controls      | Age                            | 0.09    | 0.19    | 0.003   |
|                   |                     | Female                         |         | 0.16    | 0.01    |
|                   |                     | Had family DF history          |         | 0.14    | 0.03    |
|                   | Adult Controls      | Education (college)            | 0.63    | -0.48   | 0.01    |
|                   |                     | Female                         |         | -0.48   | 0.01    |
|                   |                     | Family members (> 5)           |         | -0.38   | 0.04    |
| Practice          | Paediatric patients | Severe dengue                  | 0.07    | -0.15   | 0.04    |
|                   |                     | Rash or petechiae              |         | 0.18    | 0.01    |
|                   | Youth controls      | Age                            | 0.06    | 0.24    | < 0.001 |
|                   | Adult controls      | Unemployed                     | 0.57    | -0.92   | < 0.001 |
|                   |                     | No DF history (first-time)     |         | -0.58   | 0.008   |

$\beta$  = standardized beta coefficients; DF = dengue fever

208

209

210

### Practices against DF

211

212

213

214

215

216

217

218

219

220

221

### Discussion

222

223

224

225

226

There was a positive correlation found between knowledge and attitude domains of paediatric patients with DF. These indicate that there was a good translation of knowledge to attitude on DF among paediatric patients with DF. Their knowledge on dengue symptoms, modes of transmission, preventive practices against DF and disease management tend to have changed their beliefs that DF is a serious and threatening disease. Although paediatric patients' knowledge correlated with their attitude towards it, both knowledge and attitude

**Table 3.** Results of spearman-rank correlation between the KAP domains among paediatric and adult patients with DF and youth and adult controls

| Patients with DF          |                     |                 | Controls |                     |                 |
|---------------------------|---------------------|-----------------|----------|---------------------|-----------------|
| Variables                 | $r_s$ (95%CI)       | <i>p</i> -value |          | $r_s$ (95%CI)       | <i>p</i> -value |
| <b>Knowledge-attitude</b> |                     |                 |          |                     |                 |
| Paediatric                | 0.20 (0.08, 0.13)   | 0.002           | Youth    | 0.34 (0.24-0.48)    | < 0.001         |
| Adult                     | 0.02 (-0.51, 0.59)  | 0.95            | Adult    | -0.05 (-0.50, 0.60) | 0.84            |
| <b>Knowledge-practice</b> |                     |                 |          |                     |                 |
| Paediatric                | 0.06 (-0.06, 0.20)  | 0.36            | Youth    | 0.42 (0.34-0.57)    | < 0.001         |
| Adult                     | -0.39 (-0.81, 0.24) | 0.12            | Adult    | 0.03 (-0.58, 0.52)  | 0.91            |
| <b>Attitude-practice</b>  |                     |                 |          |                     |                 |
| Paediatric                | -0.04 (-0.15, 0.10) | 0.57            | Youth    | 0.23 (0.13-0.38)    | < 0.001         |
| Adult                     | -0.13 (-0.62, 0.48) | 0.62            | Adult    | 0.19 (-0.41, 0.68)  | 0.46            |

$r_s$ : Spearman rank correlation coefficients; 95% Confidence intervals (CI) were transformed using Fisher's R-to-Z

227  
228

229 did not correlate with their practices against DF. These findings clearly signify that the translation of knowledge  
230 and attitude to practice among paediatric patients were poor. This was also found to be true among adult  
231 patients with DF, their knowledge and attitude on DF was not correlated with their practices as well. This means  
232 that although paediatric and adult patients with DF were knowledgeable about the symptoms of DF, vector  
233 breeding sites control, transmission modes of DF, and perceived DF as a serious and threatening disease, it did  
234 not lead to change in their behaviour of doing the preventive practices against it. This implies that the poor  
235 practice against DF might have exposed them to higher risk of contracting the disease.

236 The results suggest that health programs should be designed for children and adolescents which focus  
237 on translating their knowledge and attitudes into better and effective practices against DF through behaviour  
238 change. Many programs continue to focus only on changing people's knowledge and on raising awareness,  
239 rather than physical activity programs which are more successful at producing behaviour change<sup>24</sup>. The  
240 Communication for Behavioural Impact (COMBI), a comprehensive strategy that uses communication for  
241 knowledge to have significant effect to behavioural change (making people becoming aware, informed,  
242 convinced, and deciding to act, then repeating and maintaining that action) or increased practices against DF<sup>25</sup>.  
243 Moreover, another model that facilitates behavioural change that could increase the translation of attitude to  
244 practice among children and adolescents is the Health Belief Model (HBM). This model suggests that a change  
245 in the behaviour or acting can be expected if a person perceives themselves to be at risk or susceptible to the  
246 disease (perceived susceptibility), that the disease will have serious consequences (perceived severity), a course  
247 of action will minimize consequences (perceived benefits), and the benefits of action will outweigh the cost of  
248 barriers (perceived barriers) and self-efficacy<sup>26</sup>. Both models should on changing the behaviour not only in  
249 individual and household levels but also in community level because community participation, including schools,  
250 especially children, is necessary to effectively control the vector mosquitoes<sup>27</sup>.

251 Previous studies have reported that there is a significant positive correlation between education and  
252 level of knowledge and attitude toward DF<sup>17, 21</sup>. However, in our study, paediatric patients who were senior high  
253 school tend to have increased knowledge and attitude on DF, compared to those in college or university. One  
254 possible reason could be senior high schools may have included contents about DF in their curriculum that may  
255 have increased the knowledge and attitude levels of paediatric patients in senior high school. Having DF history  
256 was also found to be a significant determinant of high knowledge mean scores among paediatric patients with  
257 DF. It may appear obvious; however, past experiences such as infection, which is prevalent among children<sup>28</sup>  
258 increased paediatric patients' knowledge about it. Moreover, as expected, age was found to increase knowledge,  
259 attitude and practices among youth controls, however, in attitude domain, the opposite was found among  
260 paediatric patients with DF. As the age of paediatric patients with DF increases, their attitude towards DF  
261 decreases. Hospitalized younger children were reported to be very conscious about their health and express  
262 very positive health attitudes than older children<sup>28, 29</sup>. This may be brought about by the fact that younger  
263 children who are hospitalized are more vulnerable to emotional upset and they experience greater anxieties,  
264 arising from separation from parents<sup>30,31</sup>.

265 Another significant determinant of attitude towards DF was the number of days in the hospital.  
266 Paediatric patients who identified hospital, doctor and nurses (70%) and health centres (65%) as their sources  
267 of information on DF, had significantly higher attitude mean scores than those who didn't identify these as their  
268 sources of information on DF. This implies that the longer they stay in the hospital, the more they perceive DF  
269 as serious and threatening which may be due to their experience of anxiety towards medical settings and

270 receiving of medical care<sup>32</sup>, especially fear of medical procedures like injection needles<sup>33</sup> (daily drawing of blood  
 271 to check their platelet counts) and they perceive medical professionals like doctors and nurses as inflictors of  
 272 trauma<sup>34</sup>. Aside from these, hospitalization also increases the chance of children to be dissatisfied with their  
 273 hospital-stay situations like food conditions<sup>35</sup>. Paediatric patients with DF were advised to avoid eating dark  
 274 coloured foods (to monitor the colour of stool for signs of bleeding)<sup>36</sup>. Hospitalized children also experience  
 275 anxiety because of limited physical activities like being absent in school, limited chance of spending time and  
 276 playing with peers and friends or siblings<sup>37</sup>.

277 Petechiae or rash was found to be a significant determinant of attitude among adult patients with DF.  
 278 As one of the common (35.3%) reported symptoms among adult patients with DF in this study, this implies that  
 279 those who had petechiae or rashes were more likely to gain belief that DF is a serious illness and anyone is at  
 280 risk of it. These cause itching and swelling of the palms/soles<sup>38</sup> and its presence may signify severity of the  
 281 disease as it is the most seen and observed among the symptoms which would have triggered the high attitude  
 282 level toward DF among adult patients. One possible reason why petechiae or rash was a significant determinant  
 283 of attitude among adult patients with DF, and not among paediatric patients with DF, may be because it is more  
 284 prevalent among paediatric patients with DF, compared to adult patients with DF<sup>23</sup>. Thus, the presence of this  
 285 symptom didn't affect the perception of paediatric patients toward DF, instead, the time when it appeared may  
 286 explain, in partial, why it was found a significant determinant of practices among paediatric patients with DF.  
 287 The presence of petechial rash (which is also described as "isles of white in the sea of red") and pruritus (severe  
 288 itching of the skin) occur towards the end of acute (febrile) phase and the beginning of the recovery phase<sup>1</sup>. This  
 289 could mean that those paediatric patients who were already having rashes during the interview may have  
 290 already changed their family/household members' behaviour and started doing the preventive practices against  
 291 DF, thus, higher practice mean scores. Severe dengue was also a significant determinant of decreased practice  
 292 among paediatric patients with DF. Paediatric patients with severe dengue, compared to those who had other  
 293 DF diagnoses, had the significantly lowest mean score in practice domain. 50% of paediatric patients with severe  
 294 dengue had to be confined in the intensive care unit (ICU). They were interviewed only after ICU confinement  
 295 which was, on average, the 5<sup>th</sup> day of hospitalization. The time spent in the ICU might have decreased the  
 296 opportunity of their family/household members to immediately do the practices against DF, thus, lower practice  
 297 mean score.  
 298

**Table 4.** Multivariate logistic regression model of predictors of absence of DF infection

| Practices                         | Likelihood Ratio Estimates |       |      |               |                  |         |
|-----------------------------------|----------------------------|-------|------|---------------|------------------|---------|
|                                   | DF                         | B     | SE   | Wald $\chi^2$ | aOR (95% CI)     | p-value |
| <b>Youth</b>                      |                            |       |      |               |                  |         |
| screen windows                    | 1                          | 1.45  | 0.31 | 21.15         | 4.25 (2.29-7.88) | < 0.001 |
| eliminate standing water          | 1                          | -1.40 | 0.41 | 11.96         | 0.24 (0.11-0.54) | 0.001   |
| mosquito eating fish              | 1                          | 2.03  | 0.45 | 20.70         | 7.62 (3.18-18.3) | < 0.001 |
| does nothing to reduce mosquitoes | 1                          | 0.98  | 0.37 | 6.87          | 2.67 (1.28-5.57) | 0.009   |
| Dengue vaccine                    | 1                          | 1.60  | 0.28 | 32.58         | 4.95 (2.86-8.56) | < 0.001 |
| covering water containers         | 1                          | -2.32 | 0.53 | 19.15         | 0.10 (0.03-0.28) | < 0.001 |
| <b>Adults</b>                     |                            |       |      |               |                  |         |
| professional pest control         | 1                          | 1.82  | 0.93 | 3.88          | 6.20 (1.01-38.1) | 0.05    |
| screen windows                    | 1                          | 3.17  | 1.25 | 6.49          | 23.9 (2.08-275)  | 0.01    |
| <b>Both</b>                       |                            |       |      |               |                  |         |
| screen windows                    | 1                          | 1.53  | 0.30 | 25.92         | 4.60 (2.56-8.28) | < 0.001 |
| eliminate standing water          | 1                          | -1.41 | 0.39 | 13.20         | 0.24 (0.11-0.52) | < 0.001 |
| mosquito eating fish              | 1                          | 2.16  | 0.44 | 24.23         | 8.69 (3.67-20.6) | < 0.001 |
| does nothing to reduce mosquitoes | 1                          | 0.70  | 0.36 | 3.83          | 2.01 (1.00-4.04) | 0.05    |
| Dengue vaccine                    | 1                          | 1.49  | 0.27 | 30.32         | 4.42 (2.61-7.55) | < 0.001 |
| covered water containers          | 1                          | -2.01 | 0.49 | 17.09         | 0.13 (0.05-0.35) | < 0.001 |

DF = degree of freedom;  $\beta$  = standardized bet coefficients; Wald  $\chi^2$  = Wald chi-square; aOR (95% CI) = adjusted odds-ratio  
 95% confidence interval

299  
 300  
 301  
 302  
 303  
 304

The difference between paediatric patients with DF and youth controls can also be seen in their sources of information. Youth controls were more likely to get more information on DF from their family members (63%), social media (e.g. facebook, Instagram, twitter, etc.) (61.3%) and school (56%) compared with paediatric patients with DF. Further analysis showed that youth controls, compared to paediatric patients with DF, have obtained

305 more knowledge on DF through the use of social media, newspaper, health brochures, family members, school  
306 and hospital, doctors or nurses. This hints that unlike paediatric patients with DF, youth controls had more access  
307 to different sources of information on DF which might have improved their knowledge on DF. For example, social  
308 media and the use of smartphones, have been seen to be a novel system for disease epidemiology<sup>39, 40</sup>. It has  
309 high acceptance rate among younger population who perceived that it could be an effective strategic health  
310 communication effort to raise dengue-related concerns in the future<sup>41</sup>. Newspaper, health brochures, family,  
311 hospital, doctors and nurses and school were found to have improved youth controls' knowledge and practice  
312 against DF which suggests that these might be effective means to increase not only the knowledge, but also the  
313 practices against DF of children.

314 Multivariate logistic regression analysis on the practices revealed that use of mosquito-eating fish, use  
315 of screen windows and Dengue vaccine were protective factors against DF. Studies have found that larvivorous  
316 fish (*Gambusia Affinis*), the common guppy (*Poecilia reticulata*), *Cyprinidae* or *Tilapia* spp. can be effectively used  
317 to control the mosquito population at their larval stages<sup>42-44</sup>. However, our data collected from both patients  
318 with DF and controls, through the use of questionnaire is subjective which might have produced false positive  
319 responses, in this case, use of mosquito-eating fish. We had no means to confirm if the participants, especially  
320 the patients really had mosquito-eating fish at home, thus, future studies should include direct household  
321 observation to validate this result. Moreover, in our study, we assumed that the use of screen windows equates  
322 to the use of glass windows in airconditioned rooms among controls, especially the youth. Screen and glass  
323 windows could be potential ways to reduce DF transmission by the reduced exposures to vectors that enter  
324 homes through open windows<sup>9</sup>. These may not have been available to the patients with DF because majority  
325 (85.2%) of them belong to households with low monthly family income, thus, increasing their vulnerability to DF  
326 infection. However, our data collected from both patients with DF and controls, through the use of questionnaire  
327 is subjective which might have produced false positive responses, which we consider one of the limitations of  
328 this study. We had no means to confirm if the participants, especially the patients with DF really had mosquito-  
329 eating fish at home or had been using screen windows, thus, future studies should include direct household  
330 observation to validate these results.

331 Surprisingly, Dengue vaccine was found to be a protective factor against DF among youth samples.  
332 Another limitation of this study was, we couldn't rely to the participants' responses about their Dengue vaccine  
333 acquisition history. We had no means to confirm whether they got vaccinated or not. Thus, this result may  
334 require more intensive studies to whether it could truly be a protective factor against DF infection. The WHO  
335 issued a conditional recommendation in April 2016 on the use of the vaccine for highly dengue-endemic areas  
336 due to a subset of trial participants who were inferred to be seronegative at time of first vaccination had a higher  
337 risk of more severe dengue and hospitalizations from dengue compared to unvaccinated participants. They still  
338 recommend preventive practices that combat vector mosquitoes to control and prevent transmission of DF  
339 infection<sup>2</sup>.

## 340 341 **Conclusions**

342 Paediatric patients with DF had significantly higher mean scores in knowledge and attitude than youth  
343 controls, who, in turn, had significantly higher mean score in practice domain compared with paediatric patients  
344 with DF. Being senior high school, days in the hospital and rash or petechiae determined increased knowledge,  
345 attitude and practices, respectively, among paediatric patients with DF. There was a significant positive  
346 correlation between knowledge and attitude of paediatric patients with DF while their knowledge and attitude  
347 were not correlated with their practices against DF. These suggest that although paediatric patients had high  
348 knowledge and attitude on DF, its translation to better practice of preventive measures against DF was poor  
349 compared with youth controls. These findings highlight the importance of behavioural change for knowledge  
350 and attitude to have significant effect to practices against DF among children through health programs campaign  
351 which are structured from COMBI and HBM. This study also adds to the emerging topics on protective factors  
352 against DF, such as use of mosquito-eating fish, use of screen windows and Dengue vaccine, however, further  
353 studies are needed to confirm these results.

354 To our knowledge, our study is the first to use hospital-based surveillance that investigated the  
355 association of clinical data to KAP domains and described the difference of KAP on DF between paediatric  
356 patients and adult patients with DF. This is also the first study to use clinical ascertainment through hospital-  
357 based surveillance among paediatric and adult patients with DF. Additionally, there was a high response rate  
358 (100%) among patients with DF and various dengue diagnoses among paediatric patients with DF at the three  
359 tertiary hospitals, allowing an increased generalizability of study findings. One of this study's major limitations  
360 was the relatively small sample size of adult patients with DF which limit the generalizability of study findings in  
361 this population. Moreover, participating hospitals were public tertiary hospitals, where most patients belong to



362 low-income families. Thus, association of income with the domains was hard to estimate. Finally, only in-patients  
363 were included in this study, limiting the analysis to those admitted to hospitals. Therefore, we recommend that  
364 future studies also include out-patients to see whether hospitalization is confounding the association between  
365 the constructs and dengue infection.

366

## 367 **Methods**

### 368 **Study and Sampling Design**

369 This study used a non-probability purposive sampling method among patients with DF admitted in 3  
370 public tertiary (>100 beds) hospitals in Metro Manila, Philippines: San Lazaro Hospital, a referral facility for  
371 Infectious/ Communicable Diseases, Quezon City General Hospital and; Pasay City General Hospital during the  
372 rainy season from 26<sup>th</sup> July to 26<sup>th</sup> November 2017. A sample size of 355 was recommended to assume that 50%  
373 of patients had good KAP on DF, with a 5% margin of error, 95% CI ( $\alpha = 0.05$ ; critical value/Z-score of 1.96) based  
374 on 4,525 cases in Metro Manila, Philippines, during the same period in 2016<sup>45</sup>. The number of DF cases increased  
375 by 15.5% in Metro Manila from January 1 to May 6 (morbidity week 1–18), which was one of the highest rates  
376 in the country in 2017<sup>46</sup>. For the controls, we followed the 1:1 ratio (one case patient/ one control) with an  
377 assumed odds-ratio of  $\geq 2$ , power ( $1-\beta$ ) of 0.80, 0.05 significance level,  $Z_{\alpha}=1.96$ <sup>47</sup>.

378

379

### 380 **Participant Inclusion and Exclusion Criteria**

381 A bedside interview was done among paediatric (<19 years old) and adult in-patients (age >18 years  
382 old) with serology-confirmed or clinically diagnosed DF, who were conscious and able to read and write.  
383 Excluded were those who were not able to comply with consent procedures, or with life-threatening  
384 comorbidities. Controls were randomly sampled individuals who had no signs and clinical symptoms of DF and  
385 who had no family member hospitalized for or diagnosed with DF at the time of interview. Community-based  
386 controls were age-matched with adult patients with DF while paediatric patients with DF were age-matched (8  
387 to 18 years old) with school-based Grade 3 to Grade 12 students.

388

### 389 **Ethical Considerations**

390 The study was written and conducted based from international and local ethical guidelines: Declaration  
391 of Helsinki, ICH-GCP Guidelines and National Ethical Guidelines for Health Research<sup>48-50</sup>. It was reviewed and  
392 approved by the Institutional Ethics and Review Boards (IERBs) of each participating hospital: Research Ethics  
393 and Review Unit of San Lazaro Hospital, Research Ethics and Technical Committee of Pasay City General Hospital  
394 and Planning, Development, Education and Research office of Quezon City General Hospital. Informed consent  
395 was obtained from all the controls and patients and their parent or legally authorized representative (LAR), or  
396 caregiver, especially of those who were under 18 years old.

397

### 398 **Forms and Instruments**

399 Socio-demographic Profile, Clinical Parameters and Symptoms. Both patients and controls were asked  
400 about their personal information like age, civil status, gender, educational attainment or employment status,  
401 and family monthly income and family and self DF history. Patients' clinical parameters like admitting diagnosis,  
402 serologic test results (NS1Ag and BLOT: IgG and IgM) and laboratory data (*i.e.*, CBC with platelet count) were  
403 obtained from medical charts which were used to identify their current DF phase (acute: febrile to critical and  
404 recovery phase). Clinical symptoms or chief complaints were also asked.

405 KAP about DF was developed by Shuaib et al.<sup>8</sup> in Jamaica which was pretested and completed three  
406 Delphi Method review rounds for question and response construction and purpose of the questionnaire. The  
407 survey has 3 domains: 29-item knowledge (dengue symptoms, modes of transmission, preventive practices and  
408 disease management), 3-item attitudes (seriousness, risk and prevention) and 12-item practices (mosquito-man  
409 contact and eliminating breeding sites)<sup>8</sup>. Knowledge and attitude domains pertain to each participant's self-  
410 report of knowledge and perception towards DF, while the practice domain involves each participant's  
411 household-report of the preventive practices against DF. We added two items in the list of sources of  
412 information (e.g. social media and "barangay" or villages and community) and 1 item in practice (e.g. dengue  
413 vaccine). A three-point scale, "yes", "no" and "I don't know" was used in knowledge domain. Correct responses  
414 were coded 1, otherwise, coded 0<sup>18</sup>. A 5-point scale, "strongly agree" to "strongly disagree" was used to identify  
415 participants' attitudes where "strongly agree" scored 2 and "agree" scored 1. Likewise, one item in practices  
416 (frequency of cleaning ditches and containers with water) used 4-point scale of "always" to "never" where  
417 "always", "often", "sometimes" were scored 3, 2 and 1, respectively. For more information on the validation  
418 procedures of the questionnaire, please see Supplementary Methods.

419  
420  
421  
422  
423  
424  
425  
426  
427  
428  
429  
430  
431  
432  
433  
434  
435  
436  
437  
438  
439  
440  
441  
442

## Statistical and Data Analysis

Statistical analysis was done using Statistical Package for Social Sciences (SPSS) version 25 (IBM Corp., Armonk, NY). We compared the groups: paediatric and adult patients and youth and adult controls by their mean scores in each KAP domain using independent samples t-test. To identify determinants (socio-demographic profiles, clinical parameters and clinical symptoms) of KAP, mean scores in each KAP domain was compared between and among the groups using independent t-test for dichotomous (2-category) variables and one-way ANOVA for multi-categorical variables. Multivariate linear regression was conducted by inputting socio-demographic and clinical variables (dummy variables [i.e., 0 or 1] for categorical variables) in the model using a stepwise method in backward selection to identify significant ( $P < 0.05$ ) determinants of KAP. We also calculated the difference in the proportion of participants (yes vs. no) in each source of information using chi-square test. Then, we compared their mean scores in each source of information to identify which increases KAP levels by using independent t-test. To calculate the correlation values between the KAP domain scores, Spearman's rank correlation ( $r_s$ ) (two-tailed) and the fisher's R-to-Z transformation to obtain confidence interval (CI) were used for the not normally distributed scores as shown by the Shapiro-Wilk and Kolmogorov-Smirnov normality tests<sup>18</sup>. All preventive practices were used in a logistic regression analysis to identify protective factors against DF infection in youth and adult samples. All significant factors ( $P < 0.05$ ) were put in the multivariate regression analysis using stepwise backward selection method.

## Data Availability

Most data generated or analysed during this study are included in the manuscript (and its Supplementary Information file). The raw data generated and analysed, are available from the corresponding author on reasonable request.

## References

1. World Health Organization. Dengue: Guidelines for Diagnosis, Treatment, Prevention and Control. WHO/HTM/NTD/DEN/2009.1 (World Health Organization, 2009)
2. World Health Organization. Dengue and severe dengue. (World Health Organization, 2018)
3. Brady, O. J. et al. Refining the global spatial limits of dengue virus transmission by evidence-based consensus. *PLoS Negl. Trop. Dis.* **6**, e1760 (2012)
4. Yboa, B. C. & Labrague, L. J. Dengue Knowledge and Preventive practices among Rural Residents in Samar Province, Philippines. *Am J Public Health Res.* **1**, 47-52 (2013)
5. Harapan, H. et al. Knowledge, attitude, and practice regarding dengue virus infection among inhabitants of Aceh, Indonesia: a cross-sectional study. *BMC Infect Dis.* **18**, 96 (2018)
6. Alyousefi, T. A. et al. A household-based survey of knowledge, attitudes and practices towards dengue fever among local urban communities in Taiz Governorate, Yemen. *BMC Infect Dis.* **16**, 543 (2016)
7. Kumaran, E. et al. Dengue knowledge, attitudes and practices and their impact on community-based vector control in rural Cambodia. *PLoS Negl. Trop. Dis.* **12**, e0006268 (2018)
8. Shuaib, F., Todd, D., Campbell-Stennett, D., Ehiri, J., Jolly, P. E. Knowledge, attitudes and practices regarding dengue infection in Westmoreland, Jamaica. *West Indian Med J.* **59**, 139-46 (2010)
9. Chen, B., Yang, J., Luo, L., Yang, Z. & Liu, Q. Who is vulnerable to dengue fever? A community survey of the 2014 outbreak in Guangzhou, China. *Int J Environ Res Public Health.* **13**, 712 (2016)
10. Kenneson, A. et al. Social-ecological factors and preventive actions decrease the risk of dengue infection at the household-level: Results from a prospective dengue surveillance study in Machala, Ecuador. *PLoS Negl. Trop. Dis.* **11**, e0006150 (2017)
11. Safdar, N., Abbo, L. M., Knobloch, M. J. & Seo, S. K. Research methods in healthcare epidemiology: Survey and qualitative research. *Infect Control Hosp Epidemiol.* **37**, 1272-1277 (2016)
12. Salkovskis, P. M. et al. Psychiatric morbidity in an accident and emergency department: characteristics of patients at presentation and one-month follow-up. *Br J Psychiatry.* **156**, 483-487 (1990)
13. Wong, L. P., Shakir, S. M., Atefi, N. & AbuBakar, S. Factors affecting dengue prevention practices: nationwide survey of the Malaysian public. *PLoS One.* **10**, e0122890 (2015)
14. Syed, M. et al. Knowledge, attitudes and practices regarding dengue fever among adults of high and low socioeconomic groups. *J Pak Med Assoc.* **60**, 243 (2010)
15. García-Betancourt, T., Higuera-Mendieta, D. R., González-Urbe, C., Cortés, S. & Quintero, J. Understanding water storage practices of urban residents of an endemic dengue area in Colombia: Perceptions, rationale and socio-demographic characteristics. *PLoS One.* **10**, e0129054 (2015)

- 474 16. Paz-Soldán, V. A. et al. Dengue knowledge and preventive practices in Iquitos, Peru. *Am J Trop Med Hyg.*  
475 **93**, 1330–1337 (2015)
- 476 17. Alves, A. C. et al. Knowledge and practices related to dengue and its vector: a community-based study from  
477 Southeast Brazil. *Rev Soc Bras Med Trop.* **49**, 222–226 (2016)
- 478 18. Dhimal, M. et al. Knowledge, attitude and practice regarding dengue fever among the healthy population  
479 of highland and lowland communities in central Nepal. *PLoS One.* **9**, e102028 (2014)
- 480 19. Saied, K. G. et al. Knowledge, attitude and preventive practices regarding dengue fever in rural areas of  
481 Yemen. *Int Health.* **7**, 420–425 (2015)
- 482 20. Chanyasanha, C., Guruge, G. R. & Sujirarat, D. Factors influencing preventive behaviors for dengue infection  
483 among housewives in Colombo, Sri Lanka. *Asia Pac J Public Health.* **27**, 96–104 (2015)
- 484 21. Al-Dubai, S. A. R., Ganasegeran, K., Alwan, M. R., Alshagga, M. A., Saif-Ali, R. Factors affecting dengue fever  
485 knowledge, attitudes and practices among selected urban, semi-urban and rural communities in  
486 Malaysia. *Southeast Asian J Trop Med Public Health.* **44**, 37 (2013)
- 487 22. Namvongsa, V. et al. Difference in clinical features between children and adult with dengue hemorrhagic  
488 shock syndrome. *Southeast Asian J Trop Med Public Health.* **44**, 72-9 (2013)
- 489 23. Souza, L. J. et al. Comparison of clinical and laboratory characteristics between children and adults with  
490 dengue. *Braz J Infect Dis.* **17**, 27-31 (2013)
- 491 24. Beckman, H., Hawley, S. & Bishop, T. Application of theory-based health behavior change techniques to the  
492 prevention of obesity in children. *J Pediatr Nurs.* **21**, 266–275 (2006)
- 493 25. Parks, W. & Lloyd, L. Planning social mobilization and communication for dengue fever prevention and  
494 control: a step-by-step guide (World Health Organization, Geneva, Switzerland, 2004)
- 495 26. Korin, M.R. Theory and fundamentals of health promotion for children and adolescents. In: Korin M. ed.  
496 Health promotion for children and adolescents. Springer, Boston, MA (2016)
- 497 27. Elder, J. & Lloyd, L. Working paper 7.3: Achieving behaviour change for dengue control: methods, scaling-  
498 up and sustainability. In: Scientific Working Group Report on Dengue: Meeting Report, 1-5 October 2006.  
499 (World Health Organization, Geneva, Switzerland, 2007)
- 500 28. Piko, B. F. & Bak, J. Children's perceptions of health and illness: images and lay concepts in preadolescence.  
501 *Health Educ Res.* **21**, 643–653 (2006)
- 502 29. Woods, S. E., Springett, J., Porcellato, L. & Dugdill, L. 'Stop it, it's bad for you and me': experiences of and  
503 views on passive smoking among primary-school children in Liverpool. *Health Educ Res.* **20**, 645-55 (2005)
- 504 30. Bonn, M. The effects of hospitalization on children: a review. *Curationis* **17**, 20–24 (1994)
- 505 31. Coyne, I. Children's experiences of hospitalization. *J Child Health Care.* **10**, 326–36 (2006)
- 506 32. Wolraich, M., Felice, M. E. & Drotar, D. The classification of child and adolescent mental diagnoses in  
507 primary care: diagnostic and statistical manual for primary care (DSM-PC) child and adolescent version. Elk  
508 Grove Village, IL. (American Academy of Pediatrics, 1996)
- 509 33. Diaz-Caneja, A., Gledhill, J., Weaver, T., Nadel, S., Garralda, E. A child's admission to hospital: a qualitative  
510 study examining the experiences of parents. *Intensive Care Med.* **31**, 1248–54 (2005)
- 511 34. Pao, M. & Bosk, A. Anxiety in medically ill children and adolescents. *Depress Anxiety.* **28**, 40–49 (2011)
- 512 35. Bsiri-Moghaddam, K., Basiri-Moghaddam, M., Sadeghmoghaddam, L. & Ahmadi, F. The concept of  
513 hospitalization of children from the view point of parents and children. *Iran J Pediatr.* **21**, 201-8 (2011)
- 514 36. Ong, W. T. Deadly dengue: Prevention, treatment, and 'Tawa Tawa'. (Philippine council for health research  
515 and development, 2014)
- 516 37. Angström-Brännström, C., Norberg, A., Jansson, L. Narratives of children with chronic illness about being  
517 comforted. *J Pediatr Nurs.* **23**, 310-316 (2008)
- 518 38. Huang, H. W., Tseng, H. C., Lee, C. H., Chuang, H. Y. & Lin, S. H. Clinical significance of skin rash in dengue  
519 fever: A focus on discomfort, complications, and disease outcome. *Asian Pac J Trop Med.* **9**, 713–718 (2016)
- 520 39. Roche, B. et al. An ecological and digital epidemiology analysis on the role of human behavior on the 2014  
521 Chikungunya outbreak in Martinique. *Sci. Rep.* **7**, 1-8 (2017)
- 522 40. Nguyen, Q. C. et al. Twitter-derived neighborhood characteristics associated with obesity and diabetes. *Sci.*  
523 *Rep.* **7**, 1-10 (2017)
- 524 41. Lwin, M. O. et al. Social media-based civic engagement solutions for dengue prevention in Sri Lanka: results  
525 of receptivity assessment. *Health Educ Res.* **31**, 1–11 (2016)
- 526 42. Noreen, M. et al. Biological control of mosquito larvae using edible fish. *Int. J. of Inov. and App. Res.* **5**, 1-6  
527 (2017)
- 528 43. Phukon, H. K. & Biswas, S. P. An investigation on larvicidal efficacy of some indigenous fish species of Assam,  
529 India. *Adv. Biores.* **4**, 22-25 (2013)

- 530 44. World Health Organization. Comprehensive guidelines for prevention and control of dengue and dengue  
531 haemorrhagic fever. (WHO, Regional Office for South-East Asia, 2011)
- 532 45. Department of Health. Weekly Dengue Cases Report, Morbidity Week 28: July 10 – July 16, 2016.  
533 Epidemiology Bureau, Public Health Surveillance Division.  
534 <https://www.doh.gov.ph/sites/default/files/statistics/DENGUE%20MW28.pdf> (2016)
- 535 46. Department of Health. Weekly Dengue Cases Report, Morbidity Week 18: January 1 – May 6, 2017.  
536 Epidemiology Bureau, Public Health Surveillance Division.  
537 [https://www.doh.gov.ph/sites/default/files/statistics/2017\\_Dengue\\_MW1-MW18.pdf](https://www.doh.gov.ph/sites/default/files/statistics/2017_Dengue_MW1-MW18.pdf) (2017)
- 538 47. Charan, J. & Biswas, T. How to calculate sample size for different study designs in medical research? *Indian*  
539 *J Psychol Med.* **35**, 121-126 (2013)
- 540 48. World Medical Association. declaration of Helsinki ethical principles for medical research involving human  
541 subjects. *JAMA.* **310**, 2191–2194 (2013)
- 542 49. European Medicines Agency. ICH topic e6 (r1) guideline for good clinical practice step 5 note for guidance  
543 on good clinical practice. (CPMP/ICH/135/95) (European Medicines Agency, 2002)
- 544 50. Philippine Health Research Ethics Board. National ethical guidelines for health research. Taguig City,  
545 Philippines (PNHRS, 2011)

546  
547

## 548 **Acknowledgments**

549 The authors would like to thank Thaddeus M. Carvajal, John Robert R. Bautista, Howell T. Ho for their assistance  
550 in the validation of the KAP questionnaire. We would also like to thank Jazteene Dale M. Villarama, Joenna Mari  
551 P. Cabarloc, Jayne Nicholei C. Borricano and Ma. Lourdes SJ. Orbeta for their assistance during data gathering.  
552 Most importantly, we are grateful to all the patients and controls who participated in this study. This study was  
553 supported by the Japan Society for the Promotion of Science (JSPS) Grant-in-Aid for Scientific Research  
554 (16H05750, 17H01624) and JSPS Bilateral Joint Research Projects which had no role in the design, data collection,  
555 statistical analysis and writing of this manuscript.

556  
557

## 557 **Author Contributions**

558 Author V.H. designed the study, wrote the protocol, conducted the interviews, analysed the data and written  
559 this manuscript. Author F.D.G., G.S. & A.C. were assigned as co-investigators in each hospital site and supervised  
560 patient recruitment and data gathering. Author A.T. & C.R. provided guidance and comments on the initial drafts  
561 of the study protocol including literature review, sampling, data gathering methods and ethical considerations.  
562 Author R.R. supervised the interviews, testing and scoring procedures for the controls. Author M.T. worked with  
563 V.H. from the submission to approval of study protocol in the hospitals and over-all data gathering procedures.  
564 Author K.W. supervised the data gathering and provided guidance and comments on the analysis and the initial  
565 drafts of this manuscript. All authors have contributed to and have approved the final manuscript.

566  
567

## 567 **Competing Interests**

568 The authors declare no competing interests.

## 569 **Supporting Information**

570 Accompanies the manuscript, file name: MS\_KAP\_Supplementary\_Information.pdf
