1 **Knowledge, attitude and practices on dengue fever among paediatric and adult in-patients**  
2 **in Metro Manila, Philippines**

3 **Von Ralph Dane M. Herbuela<sup>1</sup>, Ferdinand S. de Guzman<sup>2</sup>, Girly D. Sobrepeña<sup>3</sup>,**  
4 **Andrew Benedict F. Claudio<sup>4</sup>, Angelica Cecilia V. Tomas<sup>5</sup>, Carmina M. Arriola-delos Reyes<sup>5</sup>, Rachele A.**  
5 **Regalado<sup>6</sup>, Mariama M. Teodoro<sup>7</sup> and Kozo Watanabe<sup>1,8,\*</sup>**

6 <sup>1</sup> Graduate School of Science and Engineering, Ehime University, Bunkyo-cho 3, Matsuyama, Ehime, 790-8577,  
7 Japan

8 <sup>2</sup> Department of Family and Community Medicine, Infectious Diseases and Tropical Medicine, San Lazaro  
9 Hospital, Manila, 1003, Philippines

10 <sup>3</sup> Paediatrics Department, Quezon City General Hospital, Quezon City, 1106, Philippines

11 <sup>4</sup> Office of Nursing Service, Pasay City General Hospital, Pasay City, 1300, Philippines

12 <sup>5</sup> Department of Paediatrics, College of Medicine, University of the Philippines, Manila, 1000, Philippines

13 <sup>6</sup> Guidance Department, University of Santo Tomas - Angelicum College, Quezon City, 1114, Philippines

14 <sup>7</sup> Counselling and Educational Psychology Department, De La Salle University, Manila, 1004, Philippines

15 <sup>8</sup> Biological Control Research Unit, Centre for Natural Science and Environmental Research, De La Salle University,  
16 Manila, 1004, Philippines

17 [\\*watanabe\\_kozo@cee.ehime-u.ac.jp](mailto:watanabe_kozo@cee.ehime-u.ac.jp)

18 **ABSTRACT**

19 **Background:** Knowledge, attitude and practice (KAP) studies have included mainly community-based samples,  
20 yet, investigation on in-patients with Dengue fever (DF) through hospital-based surveillance has not been done.

21 **Methods:** This study aimed to assess and compare the KAP, identify its determinants and protective factors  
22 among 250 clinically or serologically confirmed paediatric (n = 233) and adult patients (n = 17) with DF and 250  
23 youth (n = 233) and adult (n = 17) controls.

24 **Results:** Paediatric patients with DF had significantly higher knowledge (P < 0.05) and practice (P < 0.05) domains  
25 mean scores than adult patients with DF and significantly lower practice mean scores than youth controls (P <  
26 0.05). Being senior high school, days in the hospital and rash determined increased KAP among paediatric  
27 patients with DF while no significant determinants were found among adult patients with DF. Mosquito-eating  
28 fish, screen windows and Dengue vaccine were protective factors against DF, though, further studies should  
29 confirm these results. Moreover, there was a significant positive correlation between knowledge and attitude  
30 (P < 0.01) of paediatric patients with DF, however, similar with adult patients with DF, these domains did not  
31 correlate with their practices against DF.

32 **Conclusion:** This suggests that the translation of knowledge and attitude to better practices against DF was poor.  
33 Thus, it is necessary to structure health programs on models that facilitate behavioural change among children  
34 and adults.

35 **Keywords:**

36 Dengue fever, behavioural change, protective factors

## 37 **Background**

38 To date, there has been no known cure for Dengue Fever (DF), the world's fastest spreading mosquito-  
39 borne disease which causes approximately 390 million cases per year and puts an estimated 3.9 billion people  
40 at risk in 128 countries [1-3]. Since DF epidemiology and ecology are strongly associated with human habits and  
41 activities [4], community-based studies have been done to assess the knowledge, attitude and practices (KAP)  
42 of people on DF.

43 Several community-based KAP studies have investigated the correlation among KAP domains. Harapan  
44 et al. [5] reported that good knowledge is positively associated with good practice. This is parallel to the report  
45 by Alyousefi et al. [6] that poor knowledge on DF has significant positive association with poor preventive  
46 practices. However, other similar studies had different results. Kumaran et al. [7] and Shuaib et al. [8] reported  
47 that knowledge on causes, signs, symptoms, mode of transmission and preventive practices against DF is not  
48 correlated with the practice of preventive measures against DF. Aside from these, two case-control studies  
49 reported which preventive practices are protective factors against DF. Regression models revealed that  
50 removing trash and stagnant water from around the residence, using mosquito repellent oils, use of mosquito  
51 bed nets, fumigation inside the house, and piped water inside the house can reduce the risk and vulnerability to  
52 DF infection [9, 10].

53 Most of the KAP studies have included only community-based samples and investigation on hospital-  
54 based samples with clinical or serologically-confirmed DF diagnosis has not been done. Chen et al. [9]  
55 interviewed patients who were randomly sampled from a web-based reporting system through telephone  
56 interviews. However, this method limits the collection to individuals and households with telephones. It also  
57 had 50% response and completion rate among respondents [10, 11]. On the other hand, face to face interview  
58 with questionnaire would obtain good response and acceptance rate (99%) and a low refusal rate (1%) among  
59 in- and out-patients [11, 12]. Kenneson et al. [10] also did clinical ascertainment and community screening to  
60 interview households with and without DF infections by identifying acute or recent DF infections. However, the  
61 data collected among households with acute or recent DF infections suggested self-report bias, as members of  
62 these households may have already acquired knowledge, changed their behaviour or attitude towards DF during  
63 their surveillance [10]. Therefore, hospital-based surveillance, compared with community-based surveillance,  
64 would allow us to capture patients' knowledge and attitude and their family's/household's practices against DF  
65 during hospitalization (acute phase [febrile-critical] of the infection [2-7 days] from the onset of fever [1]).

66 Previous KAP studies have also reported that sociodemographic data like income, employment,  
67 education, marital status, religion, sex, age, location, socio-economic status, type of residence and DF history  
68 were associated with KAP [5, 8, 13-21]. However, to our knowledge, no study has investigated the association  
69 between clinical parameters (e.g. diagnosis, platelet count), clinical symptoms (e.g. fever, rash, abdominal pain)  
70 and KAP, more so, the difference of determinants of KAP between paediatric and adult patients with DF. Since  
71 adults exhibit higher incidence of the severe forms of DF compared with children [22], clinical presentations of  
72 symptoms may also be significantly different between paediatric and adult patients with DF. Vomiting and skin  
73 rash were more prevalent among children while myalgia and arthralgia, nausea, thrombocytopenia were more  
74 exhibited by adult patients with DF [22, 23].

75 Based on the literatures presented, we hypothesized that paediatric and adult patients' knowledge and  
76 attitude on DF would not have significant positive relationship with their practices against DF, compared with  
77 the youth and adult controls. We also hypothesized that paediatric and adult patients with DF may have different  
78 determinants of KAP by socio-demographic profile like age, gender and education. In addition, clinical symptoms  
79 as determinants of KAP will be different between paediatric and adult patients with DF. Vomiting and skin rash  
80 would determine high KAP among paediatric patients with DF while myalgia and arthralgia, nausea,  
81 thrombocytopenia would be determinants of high KAP among adult patients with DF. With all these, we  
82 hypothesized that paediatric and adult patients with DF would have lower levels of KAP domains than the youth  
83 and adult controls, which would also give us hints on which KAP domain have aggravated the acquisition of the  
84 infection. Therefore, this study aimed to assess and compare the KAP of paediatric patients and adult patients  
85 with DF, paediatric patients with DF and youth control and adult patients with DF and adult controls. We also  
86 sought to identify the determinants of KAP domains by socio-demographic profiles, clinical parameters and  
87 symptoms, analyse the relationship among the KAP domains, and identify protective factors against DF.

## 88 **Methods**

### 89 **Study and Sampling Design**

90 This study used a non-probability purposive sampling method among patients with DF admitted in 3  
91 public tertiary (>100 beds) hospitals in Metro Manila, Philippines: San Lazaro Hospital, a referral facility for  
92 Infectious/ Communicable Diseases, Quezon City General Hospital and; Pasay City General Hospital during the  
93 rainy season from 26<sup>th</sup> July to 26<sup>th</sup> November 2017. A sample size of 355 was recommended to assume that 50%

94 of patients had good KAP on DF, with a 5% margin of error, 95% CI ( $\alpha = 0.05$ ; critical value/Z-score of 1.96) based  
95 on 4,525 cases in Metro Manila, Philippines, during the same period in 2016 [24]. The number of DF cases  
96 increased by 15.5% in Metro Manila from January 1 to May 6 (morbidity week 1–18), which was one of the  
97 highest rates in the country in 2017 [25]. For the controls, we followed the 1:1 ratio (one case patient/ one  
98 control) with an assumed odds-ratio of  $\geq 2$ , power ( $1-\beta$ ) of 0.80, 0.05 significance level,  $Z_{\alpha}=1.96$  [26].

## 99 **Participant Inclusion and Exclusion Criteria**

100 A semi-structured bedside interview was done among paediatric (<19 years old) and adult in-patients  
101 (age >18 years old) with serology-confirmed or clinically diagnosed DF, who were conscious and able to read  
102 and write. Excluded were those who were not able to comply with consent procedures, or with life-threatening  
103 comorbidities. Controls were randomly sampled individuals who had no signs and clinical symptoms of DF and  
104 who had no family member hospitalized for or diagnosed with DF at the time of interview. Community-based  
105 controls were compared with adult patients with DF while paediatric patients with DF were compared (8 to 18  
106 years old) with school-based Grade 3 to Grade 12 students.

## 107 **Ethical Considerations**

108 The study was written and conducted based from international and local ethical guidelines: Declaration  
109 of Helsinki, ICH-GCP Guidelines and National Ethical Guidelines for Health Research [27-29]. It was reviewed and  
110 approved by the Institutional Ethics and Review Boards (IERBs) of each participating hospital: Research Ethics  
111 and Review Unit of San Lazaro Hospital, Research Ethics and Technical Committee of Pasay City General Hospital  
112 and Planning, Development, Education and Research office of Quezon City General Hospital. Informed consent  
113 was obtained from all the controls and patients and/or their parent or legally authorized representative (LAR),  
114 or caregiver, especially of those who were under 18 years old.

## 115 **Forms and Instruments**

116 Socio-demographic Profile, Clinical Parameters and Symptoms. Both patients and controls were asked  
117 about their personal information like age, civil status, gender, educational attainment or employment status,  
118 and family monthly income and family and self DF history. Patients' clinical parameters like admitting diagnosis,  
119 serologic test results (NS1Ag and BLOT: IgG and IgM) and laboratory data (*i.e.*, CBC with platelet count) were

120 obtained from medical charts which were used to identify their current DF phase (acute: febrile to critical and  
121 recovery phase). Clinical symptoms or chief complaints were also asked.

122 KAP about DF was developed by Shuaib et al. [8] in Jamaica which was pretested and completed three  
123 Delphi Method review rounds for question and response construction and purpose of the questionnaire. The  
124 survey has 3 domains: 29-item knowledge (dengue symptoms, modes of transmission, preventive practices and  
125 disease management), 3-item attitudes (seriousness, risk and prevention) and 12-item practices (mosquito-man  
126 contact and eliminating breeding sites) [8]. Knowledge and attitude domains pertain to each participant's self-  
127 report of knowledge and perception towards DF, while the practice domain involves each participant's  
128 household-report of the preventive practices against DF. We added two items in the list of sources of  
129 information (e.g. social media and "barangay" or villages and community) and 1 item in practice (e.g. dengue  
130 vaccine). A three-point scale, "yes", "no" and "I don't know" was used in knowledge domain. Correct responses  
131 were coded 1, otherwise, coded 0 [18]. A 5-point scale, "strongly agree" to "strongly disagree" was used to  
132 identify participants' attitudes where "strongly agree" scored 2 and "agree" scored 1. Likewise, one item in  
133 practices (frequency of cleaning ditches and containers with water) used 4-point scale of "always" to "never"  
134 where "always", "often", "sometimes" were scored 3, 2 and 1, respectively. For more information on the  
135 permission acquisition and translation and validation procedures of the questionnaire, please see Additional File  
136 1.

### 137 **Statistical and Data Analysis**

138 Statistical analysis was done using Statistical Package for Social Sciences (SPSS) version 25 (IBM Corp.,  
139 Armonk, NY). We compared the groups: paediatric and adult patients, youth and adult controls, paediatric  
140 patients and youth controls, and adult patients and adult controls by their mean scores in each KAP domain  
141 using independent samples t-test. To identify determinants (socio-demographic profiles, clinical parameters and  
142 clinical symptoms) of KAP, we did a multiple linear regression analysis. It was conducted by inputting socio-  
143 demographic and clinical variables (dummy variables [i.e., 0 or 1] for categorical variables) in the model using a  
144 stepwise method in backward selection to identify significant ( $P < 0.05$ ) determinants of KAP. We also calculated  
145 the difference in the proportion of participants (yes vs. no) in each source of information using chi-square test.  
146 Then, we compared their mean scores in each source of information to identify which increases KAP levels by  
147 using independent t-test. To calculate the correlation values between the KAP domain scores, Spearman's rank

148 correlation ( $r_s$ ) (two-tailed) and the fisher's R-to-Z transformation to obtain confidence interval (CI) were used  
149 for the not normally distributed scores as shown by the Shapiro-Wilk and Kolmogorov-Smirnov normality tests  
150 [18]. All preventive practices were used in a logistic regression analysis to identify protective factors against DF  
151 infection in youth and adult samples. All significant factors ( $P < 0.05$ ) were put in the multiple regression analysis  
152 using stepwise backward selection method.

## 153 **Results**

### 154 **Socio-demographic Profile, Clinical Parameters and Symptoms**

155 Initially, there were 350 patients with DF participated in the study. However, we have excluded those  
156 who had incomplete responses ( $n = 15$ , 4.3%) and those whose responses came from a family member instead  
157 of the patient himself ( $n = 85$ , 24.3%). Thus, data from 500 participants comprising of 250 patients with DF  
158 (paediatrics  $n = 233$  [93.2%]; adults  $n = 17$  [6.8%]) and 250 controls (youth  $n = 233$ ; adults  $n = 17$ ) were included  
159 in the final analysis. Paediatric patients with DF had a mean (M) age of 13, and an SD ( $\pm$ ) of 3.16 years. All were  
160 single (100%), 56.7% were males, and 46.9% were in junior high school, 84% belong to a family with a monthly  
161 income of  $\leq 10,000$  pesos. The age of adult patients ranges from 19 to 49 years old (M,  $29.9 \pm 10$ ), 64.7% were  
162 females; 73.3% were single, 61.5% were employed, 70.6% belong to a family with a monthly income of  $\leq 10,000$   
163 pesos and 70.6% belong to a family with  $\leq 5$  members. All (100%) adult patients and majority (77.7%) of  
164 paediatric patients with DF had dengue with warning signs. A large proportion of paediatric patients and adult  
165 patients had no DF history (92.7% and 93.3%, respectively), had no family DF history (69% and 88.2%,  
166 respectively) and were in the acute (febrile-critical) phase of the infection (80.7% and 70.6%, respectively). More  
167 than half (68.2%) of paediatric patients and majority (88.2) of adult patients had thrombocytopenia ( $9,900/\text{mm}^3$ ).  
168 Nearly half (43%) of paediatric patients and 35.3% of adult patients had petechiae or rashes.

169 Furthermore, youth controls had a mean age of 14.11 ( $\pm 1.88$ ) years with almost half (47.6%) belong to  
170 14-16 age group while adult controls had a mean age of 26.6 ( $\pm 6.07$ ) years which range from 20 to 46 years old.  
171 Half (51.1%) of youth controls were males while 64.7% of adult controls were females. All (100%) of youth  
172 controls and majority (94.1%) of adult controls were single. Most of the youth (92.7%) and adult controls (93.8%)  
173 belong to a family with a monthly income of  $\geq 10,000$  pesos. There was a preponderance of youth (86.7%) and  
174 adult (94.1%) controls who had no DF history. More than half of youth (79.4%) and adult controls (58.8%) had

175 no family DF history. For more information on the profile of patients with DF and controls, please see Additional  
176 file 2: Table S1.

### 177 **Prevalence of good knowledge, attitudes and practices**

178 An independent samples t-test revealed that paediatric patients (PP) obtained significantly higher mean  
179 scores than adult patients (AP) in knowledge ( $P = 0.03$ ) and practice ( $P = 0.02$ ) domains as shown in **Figure 1**. In  
180 control group, adult controls (AC) had significantly higher mean scores than youth controls (YC) in all domains:  
181 knowledge ( $P < 0.001$ ), attitude ( $P < 0.001$ ) and practice ( $P = 0.02$ ). When we compared the mean scores of KAP  
182 domains between paediatric patients with DF and youth controls, the former had significantly higher mean  
183 scores than the latter in knowledge ( $P < 0.001$ ) and attitude ( $P < 0.001$ ) domains. As expected, paediatric patients  
184 with DF obtained lower mean score than youth controls in practice domain ( $P = 0.03$ ) and adult patients with DF  
185 had significantly lower mean scores than adult controls in knowledge ( $P < 0.001$ ) and practice ( $P < 0.001$ )  
186 domains.

### 187 **Determinants of knowledge, attitudes and practices**

188 Multiple linear regression analysis found significant regression equations in all KAP domains among  
189 paediatric patients with DF as shown in **Table 1**. It showed that knowledge increased significantly more in  
190 paediatric patients with DF who were senior high school while it decreased significantly more in paediatric  
191 patients who were in college and those who had DF for the first time. Being senior high school also tended to  
192 increase paediatric patients' attitude. Then, as their days in the hospital increases, their attitude scores also  
193 increase, however, as their age increases, their attitude score decreases. Further, practice scores tend to  
194 decrease among those with severe dengue, however, it tends to increase to those paediatric patients who had  
195 petechiae or rash. Age was found to increase knowledge, attitude and practice, being female increased both  
196 knowledge and attitude and having family DF history increased attitude among youth controls. While no  
197 significant determinants were found among adult patients with DF, being in college or university, being female  
198 and being in a family with more than 5 members decreased attitude and being unemployed and having DF for  
199 the first time, decreased practice among adult controls.



## 200 Correlation among knowledge, attitudes and practices

201 Spearman rank correlation revealed that there was a significant positive correlation between  
 202 knowledge and attitude domains of paediatric patients with DF as shown in **Table 2**. However, as hypothesized,  
 203 there was no correlation found in knowledge-practice and attitude-practice domains of both paediatric and  
 204 adult patients with DF. Among controls, only youth controls had obtained significant positive correlations among  
 205 the KAP domains, wherein a strong correlation was found between knowledge-practice domains with a  
 206 correlation coefficient of 0.42 (95% CI: 0.34-0.57).

**Table 1.** Multiple linear regression results showing the determinants of KAP among patients with DF and controls

| Outcome Variables |                     | Determinants                   | R <sup>2</sup> | β     | p-value |
|-------------------|---------------------|--------------------------------|----------------|-------|---------|
| Knowledge         | Paediatric patients | Education (senior high school) | 0.09           | 0.18  | 0.01    |
|                   |                     | Education (college)            |                | -0.16 | 0.02    |
|                   |                     | No DF history (first-time)     |                | -0.15 | 0.04    |
|                   | Youth controls      | Age                            | 0.18           | 0.38  | < 0.001 |
|                   |                     | Female                         |                | 0.19  | 0.002   |
| Attitude          | Paediatric patients | Age                            | 0.11           | -0.30 | 0.004   |
|                   |                     | Education (senior high school) |                | 0.39  | < 0.001 |
|                   |                     | Days in the hospital           |                | 0.16  | 0.04    |
|                   | Youth controls      | Age                            | 0.09           | 0.19  | 0.003   |
|                   |                     | Female                         |                | 0.16  | 0.01    |
|                   |                     | Had family DF history          |                | 0.14  | 0.03    |
|                   | Adult Controls      | Education (college)            | 0.63           | -0.48 | 0.01    |
|                   |                     | Female                         |                | -0.48 | 0.01    |
|                   |                     | Family members (> 5)           |                | -0.38 | 0.04    |
| Practice          | Paediatric patients | Severe dengue                  | 0.07           | -0.15 | 0.04    |
|                   |                     | Rash or petechiae              |                | 0.18  | 0.01    |
|                   | Youth controls      | Age                            | 0.06           | 0.24  | < 0.001 |
|                   | Adult controls      | Unemployed                     | 0.57           | -0.92 | < 0.001 |
|                   |                     | No DF history (first-time)     |                | -0.58 | 0.008   |

β = standardized beta coefficients; DF = dengue fever

218

## 219 Sources of information on DF

220 Television (TV) was the main source of information among patients with DF (75.2%) and controls (72%).  
 221 Chi-square test analyses showed that paediatric and adult patients with DF were more likely to get information  
 222 on DF from hospital, doctors and nurses (68.8%, P < 0.001) and health centres (64%, P < 0.001), compared with  
 223 youth and adult controls. More than half of youth (60.5%) and adult controls (53%) identified social media (e.g.  
 224 Facebook, Twitter, Instagram etc.) (60 %, P < 0.001) and family members (63% and 59%, P < 0.001) and school  
 225 (55.8% and 52.9%, P 0.04) as their sources of information about DF. Further analysis of mean score comparisons  
 226 using independent t- test found that paediatric and adult patients who reported to have obtained information  
 227 on DF through newspaper and health centre, respectively, had higher knowledge mean scores. In youth controls,

228 those who have obtained information on DF through social media, newspaper, health brochures, family  
 229 members, school, hospital, doctors and nurses and health centres had higher mean scores in knowledge domain.  
 230 Attitude and practice mean scores were higher among those paediatric patients with DF and youth controls who  
 231 had identified newspaper, health brochures, family, school, hospital, doctors and nurses, barangay and  
 232 community and health centres as their sources of information on DF. Adult controls who reported neighbours  
 233 as their source of information on DF also had high attitude mean scores and those who had high practice mean  
 234 scores reported barangay and community and workplace as their sources of information on DF. (Additional file  
 235 3: Table S2).

**Table 2.** Correlation between the KAP domains among patients with DF and controls

| Patients with DF          |                     |                 | Controls |                     |                 |
|---------------------------|---------------------|-----------------|----------|---------------------|-----------------|
| Variables                 | $r_s$ (95%CI)       | <i>p</i> -value |          | $r_s$ (95%CI)       | <i>p</i> -value |
| <b>Knowledge-attitude</b> |                     |                 |          |                     |                 |
| Paediatric                | 0.20 (0.08, 0.13)   | 0.002           | Youth    | 0.34 (0.24-0.48)    | < 0.001         |
| Adult                     | 0.02 (-0.51, 0.59)  | 0.95            | Adult    | -0.05 (-0.50, 0.60) | 0.84            |
| <b>Knowledge-practice</b> |                     |                 |          |                     |                 |
| Paediatric                | 0.06 (-0.06, 0.20)  | 0.36            | Youth    | 0.42 (0.34-0.57)    | < 0.001         |
| Adult                     | -0.39 (-0.81, 0.24) | 0.12            | Adult    | 0.03 (-0.58, 0.52)  | 0.91            |
| <b>Attitude-practice</b>  |                     |                 |          |                     |                 |
| Paediatric                | -0.04 (-0.15, 0.10) | 0.57            | Youth    | 0.23 (0.13-0.38)    | < 0.001         |
| Adult                     | -0.13 (-0.62, 0.48) | 0.62            | Adult    | 0.19 (-0.41, 0.68)  | 0.46            |

$r_s$ : Spearman rank correlation coefficients; 95% Confidence intervals (CI) were transformed using Fisher's R-to-Z

## 236 Practices against DF

237 All preventive practices were used in a logistic regression analysis to identify protective factors against  
 238 DF. Then, after a multivariate regression analysis, use of mosquito eating fish, Dengue vaccine, use of screen  
 239 windows, and doing at least one preventive practice against DF were found to be protective factors against DF  
 240 among youth samples (paediatric patients with DF and youth controls) as shown in **Table 3**. Among adults (adult  
 241 patients with DF and adult controls), only the use of screen windows was identified as a significant protective  
 242 factor against DF with adjusted odds-ratio (aOR) of 23.9 (95% CI: 2.08-275.2,  $P = 0.01$ ). For both youth and adult  
 243 samples, mosquito eating fish, screen windows, and Dengue vaccine were identified as protective factors against  
 244 DF infection. The strongest factor in the model was use of mosquito eating fish, with an adjusted ratio (aOR) of  
 245 8.69 (95% CI: 3.67-20.57,  $P = < 0.001$ ).

**Table 3.** Multiple logistic regression model of predictors of absence of DF infection

| Practices                         | Likelihood Ratio Estimates |         |      |               |                  |         |
|-----------------------------------|----------------------------|---------|------|---------------|------------------|---------|
|                                   | DF                         | $\beta$ | SE   | Wald $\chi^2$ | aOR (95% CI)     | p-value |
| <b>Youth</b>                      |                            |         |      |               |                  |         |
| screen windows                    | 1                          | 1.45    | 0.31 | 21.15         | 4.25 (2.29-7.88) | < 0.001 |
| eliminate standing water          | 1                          | -1.40   | 0.41 | 11.96         | 0.24 (0.11-0.54) | 0.001   |
| mosquito eating fish              | 1                          | 2.03    | 0.45 | 20.70         | 7.62 (3.18-18.3) | < 0.001 |
| does nothing to reduce mosquitoes | 1                          | 0.98    | 0.37 | 6.87          | 2.67 (1.28-5.57) | 0.009   |
| Dengue vaccine                    | 1                          | 1.60    | 0.28 | 32.58         | 4.95 (2.86-8.56) | < 0.001 |
| covering water containers         | 1                          | -2.32   | 0.53 | 19.15         | 0.10 (0.03-0.28) | < 0.001 |
| <b>Adults</b>                     |                            |         |      |               |                  |         |
| professional pest control         | 1                          | 1.82    | 0.93 | 3.88          | 6.20 (1.01-38.1) | 0.05    |
| screen windows                    | 1                          | 3.17    | 1.25 | 6.49          | 23.9 (2.08-275)  | 0.01    |
| <b>Both</b>                       |                            |         |      |               |                  |         |
| screen windows                    | 1                          | 1.53    | 0.30 | 25.92         | 4.60 (2.56-8.28) | < 0.001 |
| eliminate standing water          | 1                          | -1.41   | 0.39 | 13.20         | 0.24 (0.11-0.52) | < 0.001 |
| mosquito-eating fish              | 1                          | 2.16    | 0.44 | 24.23         | 8.69 (3.67-20.6) | < 0.001 |
| does nothing to reduce mosquitoes | 1                          | 0.70    | 0.36 | 3.83          | 2.01 (1.00-4.04) | 0.05    |
| Dengue vaccine                    | 1                          | 1.49    | 0.27 | 30.32         | 4.42 (2.61-7.55) | < 0.001 |
| covered water containers          | 1                          | -2.01   | 0.49 | 17.09         | 0.13 (0.05-0.35) | < 0.001 |

DF = degree of freedom;  $\beta$  = standardized bet coefficients; Wald  $\chi^2$  = Wald chi-square; aOR (95% CI) = adjusted odds-ratio 95% confidence interval

## 246 Discussion

247 There was a positive correlation found between knowledge and attitude domains of paediatric patients  
 248 with DF. These indicate that there was a good translation of knowledge to attitude on DF among paediatric  
 249 patients with DF. Their knowledge on dengue symptoms, modes of transmission, preventive practices against  
 250 DF and disease management tend to have changed their beliefs that DF is a serious and threatening disease.  
 251 Although paediatric patients' knowledge correlated with their attitude towards it, both knowledge and attitude  
 252 did not correlate with their practices against DF. These findings clearly signify that the translation of knowledge  
 253 and attitude to practice among paediatric patients were poor. This was also found to be true among adult  
 254 patients with DF, their knowledge and attitude on DF was not correlated with their practices as well. This means  
 255 that although paediatric and adult patients with DF were knowledgeable about the symptoms of DF, vector  
 256 breeding sites control, transmission modes of DF, and perceived DF as a serious and threatening disease, it did  
 257 not lead to change in their behaviour of doing the preventive practices against it. This implies that the poor  
 258 practice against DF might have exposed them to higher risk of contracting the disease.

259 The results suggest that health programs should be designed for children and adolescents which focus  
 260 on translating their knowledge and attitudes into better and effective practices against DF through behaviour  
 261 change. Many programs continue to focus only on changing people's knowledge and on raising awareness,  
 262 rather than physical activity programs which are more successful at producing behaviour change [30]. The  
 263 Communication for Behavioural Impact (COMBI), a comprehensive strategy that uses communication for

264 knowledge to have significant effect to behavioural change (making people becoming aware, informed,  
265 convinced, and deciding to act, then repeating and maintaining that action) or increased practices against DF  
266 [7,31]. Moreover, another model that facilitates behavioural change that could increase the translation of  
267 attitude to practice among children and adolescents is the Health Belief Model (HBM). This model suggests that  
268 a change in the behaviour or acting can be expected if a person perceives themselves to be at risk or susceptible  
269 to the disease (perceived susceptibility), that the disease will have serious consequences (perceived severity), a  
270 course of action will minimize consequences (perceived benefits), and the benefits of action will outweigh the  
271 cost of barriers (perceived barriers) and self-efficacy [32]. Both models should on changing the behaviour not  
272 only in individual and household levels but also in community level because community participation, including  
273 schools, especially children, is necessary to effectively control the vector mosquitoes [33].

274         Previous studies have reported that there is a significant positive correlation between education and  
275 level of knowledge and attitude toward DF [17, 21]. However, in our study, paediatric patients who were senior  
276 high school tend to have increased knowledge and attitude on DF, compared to those in college or university.  
277 One possible reason could be senior high schools may have included contents about DF in their curriculum that  
278 may have increased the knowledge and attitude levels of paediatric patients in senior high school. Having DF  
279 history was also found to be a significant determinant of high knowledge mean scores among paediatric patients  
280 with DF. It may appear obvious; however, past experiences such as infection, which is prevalent among children  
281 [28] increased paediatric patients' knowledge about it. Moreover, as expected, age was found to increase  
282 knowledge, attitude and practices among youth controls, however, in attitude domain, the opposite was found  
283 among paediatric patients with DF. As the age of paediatric patients with DF increases, their attitude towards  
284 DF decreases. Hospitalized younger children were reported to be very conscious about their health and express  
285 very positive health attitudes than older children [34,35]. This may be brought about by the fact that younger  
286 children who are hospitalized are more vulnerable to emotional upset and they experience greater anxieties,  
287 arising from separation from parents [36, 37].

288         Another significant determinant of attitude towards DF was the number of days in the hospital.  
289 Paediatric patients who identified hospital, doctor and nurses (70%) and health centres (65%) as their sources  
290 of information on DF, had significantly higher attitude mean scores than those who didn't identify these as their  
291 sources of information on DF. This implies that the longer they stay in the hospital, the more they perceive DF  
292 as serious and threatening which may be due to their experience of anxiety towards medical settings and

293 receiving of medical care [38], especially fear of medical procedures like injection needles [39] (daily drawing of  
294 blood to check their platelet counts) and they perceive medical professionals like doctors and nurses as inflictors  
295 of trauma [40]. Aside from these, hospitalization also increases the chance of children to be dissatisfied with  
296 their hospital-stay situations like food conditions [41]. Paediatric patients with DF were advised to avoid eating  
297 dark coloured foods (to monitor the colour of stool for signs of bleeding) [42]. Hospitalized children also  
298 experience anxiety because of limited physical activities like being absent in school, limited chance of spending  
299 time and playing with peers and friends or siblings [43].

300           Petechiae or rash was found to be a significant determinant of attitude among adult patients with DF.  
301 As one of the common (35.3%) reported symptoms among adult patients with DF in this study, this implies that  
302 those who had petechiae or rashes were more likely to gain belief that DF is a serious illness and anyone is at  
303 risk of it. These cause itching and swelling of the palms/soles [44] and its presence may signify severity of the  
304 disease as it is the most seen and observed among the symptoms which would have triggered the high attitude  
305 level toward DF among adult patients. One possible reason why petechiae or rash was a significant determinant  
306 of attitude among adult patients with DF, and not among paediatric patients with DF, was its high prevalence  
307 among paediatric patients with DF, compared with adult patients with DF [23]. Thus, the presence of this  
308 symptom didn't affect the perception of paediatric patients toward DF, instead, the time when it appeared may  
309 explain, in partial, why it was found a significant determinant of practices among paediatric patients with DF.  
310 The presence of petechial rash (which is also described as "isles of white in the sea of red") and pruritus (severe  
311 itching of the skin) occur towards the end of acute (febrile) phase and the beginning of the recovery phase [1].  
312 This could mean that those paediatric patients who were already having rashes during the interview may have  
313 already changed their family/household members' behaviour and started doing the preventive practices against  
314 DF, thus, higher practice mean scores. Severe dengue was also a significant determinant of decreased practice  
315 among paediatric patients with DF. Paediatric patients with severe dengue, compared to those who had other  
316 DF diagnoses, had the significantly lowest mean score in practice domain. 50% of paediatric patients with severe  
317 dengue had to be confined in the intensive care unit (ICU). They were interviewed only after ICU confinement  
318 which was, on average, the 5<sup>th</sup> day of hospitalization. The time spent in the ICU might have decreased the  
319 opportunity of their family/household members to immediately do the practices against DF, thus, lower practice  
320 mean score.

321           The difference between paediatric patients with DF and youth controls can also be seen in their sources  
322 of information. Youth controls were more likely to get more information on DF from their family members (63%),  
323 social media (e.g. facebook, Instagram, twitter, etc.) (61.3%) and school (56%) compared with paediatric patients  
324 with DF. Further analysis showed that youth controls, compared to paediatric patients with DF, have obtained  
325 more knowledge on DF through the use of social media, newspaper, health brochures, family members, school  
326 and hospital, doctors or nurses. This hints that unlike paediatric patients with DF, youth controls had more access  
327 to different sources of information on DF which might have improved their knowledge on DF. For example, social  
328 media and the use of smartphones, have been seen to be a novel system for disease epidemiology [45, 46]. It  
329 has high acceptance rate among younger population who perceived that it could be an effective strategic health  
330 communication effort to raise dengue-related concerns in the future [47]. Newspaper, health brochures, family,  
331 hospital, doctors and nurses and school were found to have improved youth controls' knowledge and practice  
332 against DF which suggests that these might be effective means to increase not only the knowledge, but also the  
333 practices against DF of children.

334           Multiple logistic regression analysis on the practices revealed that use of mosquito-eating fish, use of  
335 screen windows and Dengue vaccine were protective factors against DF. Studies have found that larvivorous fish  
336 (*Gambusia Affinis*), the common guppy (*Poecilia reticulata*), *Cyprinidae* or *Tilapia* spp. can be effectively used to  
337 control the mosquito population at their larval stages [48-50]. However, our data collected from both patients  
338 with DF and controls, through the use of questionnaire is subjective which might have produced false positive  
339 responses, in this case, use of mosquito-eating fish. We had no means to confirm if the participants, especially  
340 the patients really had mosquito-eating fish at home, thus, future studies should include direct household  
341 observation to validate this result. Moreover, in our study, we assumed that the use of screen windows equates  
342 to the use of glass windows in airconditioned rooms among controls, especially the youth. Screen and glass  
343 windows could be potential ways to reduce DF transmission by the reduced exposures to vectors that enter  
344 homes through open windows [9]. These may not have been available to the patients with DF because majority  
345 (85.2%) of them belong to households with low monthly family income, thus, increasing their vulnerability to DF  
346 infection. However, our data collected from both patients with DF and controls, through the use of questionnaire  
347 is subjective which might have produced false positive responses, which we consider one of the limitations of  
348 this study. We had no means to confirm if the participants, especially the patients with DF really had mosquito-

349 eating fish at home or had been using screen windows, thus, future studies should include direct household  
350 observation to validate these results.

351 Surprisingly, Dengue vaccine was found to be a protective factor against DF among youth samples.  
352 Another limitation of this study was, we couldn't rely to the participants' responses about their Dengue vaccine  
353 acquisition history. We had no means to confirm whether they got vaccinated or not. Thus, this result may  
354 require more intensive studies to whether it could truly be a protective factor against DF infection. The WHO  
355 issued a conditional recommendation in April 2016 on the use of the vaccine for highly dengue-endemic areas  
356 due to a subset of trial participants who were inferred to be seronegative at time of first vaccination had a higher  
357 risk of more severe dengue and hospitalizations from dengue compared to unvaccinated participants. They still  
358 recommend preventive practices that combat vector mosquitoes to control and prevent transmission of DF  
359 infection [2].

## 360 **Conclusions**

361 Paediatric patients with DF had significantly higher mean scores in knowledge and attitude than youth  
362 controls, who, in turn, had significantly higher mean score in practice domain compared with paediatric patients  
363 with DF. Being senior high school, days in the hospital and rash or petechiae determined increased knowledge,  
364 attitude and practices, respectively, among paediatric patients with DF. There was a significant positive  
365 correlation between knowledge and attitude of paediatric patients with DF while their knowledge and attitude  
366 were not correlated with their practices against DF. These suggest that although paediatric patients had high  
367 knowledge and attitude on DF, its translation to better practice of preventive measures against DF was poor  
368 compared with youth controls. These findings highlight the importance of behavioural change for knowledge  
369 and attitude to have significant effect to practices against DF among children through health programs campaign  
370 which are structured from COMBI and HBM. This study also adds to the emerging topics on protective factors  
371 against DF, such as use of mosquito-eating fish, use of screen windows and Dengue vaccine, however, further  
372 studies are needed to confirm these results.

373 To our knowledge, our study is the first to use hospital-based surveillance that investigated the  
374 association of clinical data to KAP domains and described the difference of KAP on DF between paediatric  
375 patients and adult patients with DF. This is also the first study to use clinical ascertainment through hospital-  
376 based surveillance among paediatric and adult patients with DF. Additionally, there was a high response rate

377 (100%) among patients with DF and various dengue diagnoses among paediatric patients with DF at the three  
378 tertiary hospitals, allowing an increased generalizability of study findings. One of this study's major limitations  
379 was the relatively small sample size of adult patients with DF which limit the generalizability of study findings in  
380 this population. Moreover, participating hospitals were public tertiary hospitals, where most patients belong to  
381 low-income families. Thus, association of income with the domains was hard to estimate. Finally, only in-patients  
382 were included in this study, limiting the analysis to those admitted to hospitals. Therefore, we recommend that  
383 future studies also include out-patients to see whether hospitalization is confounding the association between  
384 the constructs and dengue infection.

### 385 **Abbreviations**

386 DF, Dengue fever; KAP, knowledge, attitude and practices; ICH-GCP, International Conference on  
387 Harmonization-Good Clinical Practice; LARs, Legally authorized representatives; NS1Ag, Non-structural protein  
388 1 antigen; IgG, Immunoglobulin G; IgM, Immunoglobulin M; CBC, complete blood count; CI, Confidence interval; M,  
389 Mean; aOR, Adjusted odds ratio; COMBI, Communication for behavioral impact; HMB, Health belief model; WHO,  
390 World health organization

### 391 **Declarations**

#### 392 **Ethics approval and consent to participate**

393 This study underwent review and was approved by the different institutional ethics research boards (IERBs) of  
394 the three hospitals participated in the study: Research Ethics and Review Unit of San Lazaro Hospital, Research  
395 Ethics and Technical Committee of Pasay City General Hospital and Planning, Development, Education and  
396 Research office of Quezon City General Hospital. Informed consent was obtained from all the patients and their  
397 parents, legally authorized representatives (LARs) or caregivers, especially for those who were under 18 years  
398 of age and youth and adult controls.

#### 399 **Consent for publication**

400 Not applicable.



401 **Availability of data and materials**

402 The datasets supporting the conclusions of this article are included within the article and its additional files.

403 MS\_KAP\_AF1.docx Additional file 1: Detailed description of the knowledge, attitude and practices (KAP) on

404 Dengue Fever questionnaire permission acquisition, translation and validation procedures (DOCX 16 KB)

405 MS\_KAP\_AF2.docx Additional file 2: Profile of pediatric and adult patients with DF and youth and adult controls

406 (DOCX 25 KB)

407 MS\_KAP\_AF3.docx Additional file 3: Detailed information on the sources of information on dengue fever of

408 pediatric and adult patients with DF and controls. (DOCX 41 KB)

409 **Competing Interests**

410 The authors declare that they have no competing interests.

411 **Funding**

412 This study was supported by the Japan Society for the Promotion of Science (JSPS) Grant-in-Aid for Scientific

413 Research (16H05750, 17H01624) and JSPS Bilateral Joint Research Projects which had no role in the design, data

414 collection, statistical analysis and writing of this manuscript.

415 **Author Contributions**

416 Author V.H. designed the study, wrote the protocol, conducted the interviews, analysed the data and written

417 this manuscript. Author F.D.G., G.S. & A.C. were assigned as co-investigators in each hospital site and supervised

418 patient recruitment and data gathering. Author A.T. & C.R. provided guidance and comments on the initial drafts

419 of the study protocol including literature review, sampling, data gathering methods and ethical considerations.

420 Author R.R. supervised the interviews, testing and scoring procedures for the controls. Author M.T. worked with

421 V.H. from the submission to approval of study protocol in the hospitals and over-all data gathering procedures.

422 Author K.W. supervised the data gathering and provided guidance and comments on the analysis and the initial

423 drafts of this manuscript. All authors have contributed to and have approved the final manuscript.

## 424 **Acknowledgments**

425 The authors would like to thank Thaddeus M. Carvajal, John Robert R. Bautista, Howell T. Ho for their assistance  
426 in the validation of the KAP questionnaire. We would also like to thank Jazteene Dale M. Villarama, Joenna Mari  
427 P. Cabarloc, Jayne Nicholei C. Borricano and Ma. Lourdes SJ. Orbeta for their assistance during data gathering.  
428 Most importantly, we are grateful to all the patients and controls who participated in this study. This study was  
429 supported by the Japan Society for the Promotion of Science (JSPS) Grant-in-Aid for Scientific Research  
430 (16H05750, 17H01624) and JSPS Bilateral Joint Research Projects which had no role in the design, data collection,  
431 statistical analysis and writing of this manuscript.

## 432 **References**

- 433 1. World Health Organization. Dengue: guidelines for diagnosis, treatment, prevention and control. New  
434 edition 2009. <http://www.who.int/tdr/publications/documents/dengue-diagnosis.pdf>. Accessed 03  
435 May 2017.
- 436 2. World Health Organization. Dengue and severe dengue. World Health Organization, 2018.  
437 <https://www.who.int/news-room/fact-sheets/detail/dengue-and-severe-dengue>. Accessed 12 May 2017.
- 438 3. Brady OJ, Gething PW, Bhatt S, Messina JP, Brownstein JS, Hoen AG, et al. Refining the global spatial limits  
439 of dengue virus transmission by evidence-based consensus. *PLoS Negl. Trop. Dis.* 2012;6:e1760
- 440 4. Yboa BC & Labrague LJ. Dengue Knowledge and Preventive practices among Rural Residents in Samar  
441 Province, Philippines. *Am J Public Health Res.* 2013;1:47-52
- 442 5. Harapan H, Rajamoorthy Y, Anwar S, Bustamam A, Radiansyah A, et al. Knowledge, attitude, and practice  
443 regarding dengue virus infection among inhabitants of Aceh, Indonesia: a cross-sectional study. *BMC Infect*  
444 *Dis.* 2018;18:96
- 445 6. Alyousefi TA, Abdul-Ghani R, Mahdy MA, Al-Eryani SM, Raja YA, et al. A household-based survey of  
446 knowledge, attitudes and practices towards dengue fever among local urban communities in Taiz  
447 Governorate, Yemen. *BMC Infect Dis.* 2016;16:543
- 448 7. Kumaran E, Doum D, Keo V, Sokha L, Sam B, et al. Dengue knowledge, attitudes and practices and their  
449 impact on community-based vector control in rural Cambodia. *PLoS Negl. Trop. Dis.* 2018;12:e0006268

- 450 8. Shuaib F, Todd D, Campbell-Stennett D, Ehiri J, Jolly PE. Knowledge, attitudes and practices regarding  
451 dengue infection in Westmoreland, Jamaica. *West Indian Med J.* 2010;59:139–46
- 452 9. Chen B, Yang J, Luo L, Yang Z & Liu Q. Who is vulnerable to dengue fever? A community survey of the 2014  
453 outbreak in Guangzhou, China. *Int J Environ Res Public Health.* 2016;13:712
- 454 10. Kenneson A, Beltran-Ayala E, Borbor-Cordova MJ, Polhemus ME, Ryan SJ, et al. Social-ecological factors  
455 and preventive actions decrease the risk of dengue infection at the household-level: Results from a  
456 prospective dengue surveillance study in Machala, Ecuador. *PLoS Negl. Trop. Dis.* 2017;11:e0006150
- 457 11. Safdar N, Abbo LM, Knobloch MJ & Seo SK. Research methods in healthcare epidemiology: Survey and  
458 qualitative research. *Infect Control Hosp Epidemiol.* 2016;37:1272-1277
- 459 12. Salkovskis PM, Storer D, Atha C, Warwick HMC. Psychiatric morbidity in an accident and emergency  
460 department: characteristics of patients at presentation and one-month follow-up. *Br J Psychiatry.*  
461 1990;156: 483–487
- 462 13. Wong LP, Shakir SM, Atefi N & AbuBakar S. Factors affecting dengue prevention practices: nationwide  
463 survey of the Malaysian public. *PLoS One.* 2015;10:e0122890
- 464 14. Syed M, Saleem T, Syeda UR, Habib M, Zahid R, et al. Knowledge, attitudes and practices regarding dengue  
465 fever among adults of high and low socioeconomic groups. *J Pak Med Assoc.* 2010;60:243
- 466 15. García-Betancourt T, Higuera-Mendieta DR, González-Uribe C, Cortés S & Quintero J. Understanding water  
467 storage practices of urban residents of an endemic dengue area in Colombia: Perceptions, rationale and  
468 socio-demographic characteristics. *PLoS One.* 2015;10:e0129054
- 469 16. Paz-Soldán VA, Morrison AC, Cordova Lopez JJ, Lenhart A, Scott TW, et al. Dengue knowledge and  
470 preventive practices in Iquitos, Peru. *Am J Trop Med Hyg.* 2015;93:1330–1337
- 471 17. Alves AC, Fabbro AL, Passos ADC, Carniero AFTM, Jorge TM, et al. Knowledge and practices related to  
472 dengue and its vector: a community-based study from Southeast Brazil. *Rev Soc Bras Med Trop.*  
473 2016;49:222–226
- 474 18. Dhimal M, Aryal KK, Dhimal ML, Gautam I, Singh SP, et al. Knowledge, attitude and practice regarding  
475 dengue fever among the healthy population of highland and lowland communities in central Nepal. *PLoS*  
476 *One.* 2014;9:e102028
- 477 19. Saied KG, Al-Taiar A, Altaire A, Alqadsi A, Alariqi EF et al. Knowledge, attitude and preventive practices  
478 regarding dengue fever in rural areas of Yemen. *Int Health.* 2015;7:420–425

- 479 20. Chanyasanha C, Guruge GR & Sujirarat D. Factors influencing preventive behaviors for dengue infection  
480 among housewives in Colombo, Sri Lanka. *Asia Pac J Public Health*. 2015;27:96–104
- 481 21. Al-Dubai SAR, Ganasegeran K, Alwan MR, Alshagga MA, Saif-Ali R. Factors affecting dengue fever  
482 knowledge, attitudes and practices among selected urban, semi-urban and rural communities in  
483 Malaysia. *Southeast Asian J Trop Med Public Health*. 2013;44:37
- 484 22. Namvongsa V, Sirivichayakul C, Songsithichok S, Chanthavanich P, Chocejindachai W, et al. Difference in  
485 clinical features between children and adult with dengue hemorrhagic shock syndrome. *Southeast Asian J*  
486 *Trop Med Public Health*. 2013;44:72-9
- 487 23. Souza LJ de, Pessanha LB, Mansur LC, Souza LA de, Ribeiro MBT, et al. Comparison of clinical and laboratory  
488 characteristics between children and adults with dengue. *Braz J Infect Dis*. 2013;17:27-31
- 489 24. Department of Health. Weekly Dengue Cases Report, Morbidity Week 28: July 10 – 16 July 2016.  
490 Epidemiology Bureau, Public Health Surveillance Division. 2016.  
491 <https://www.doh.gov.ph/sites/default/files/statistics/DENGUE%20MW28.pdf>. Accessed 05 May 2017.
- 492 25. Department of Health. Weekly Dengue Cases Report, Morbidity Week 18: January 1 – 6 May 2017.  
493 Epidemiology Bureau, Public Health Surveillance Division. 2017.  
494 [https://www.doh.gov.ph/sites/default/files/statistics/2017\\_Dengue\\_MW1-MW18.pdf](https://www.doh.gov.ph/sites/default/files/statistics/2017_Dengue_MW1-MW18.pdf). Accessed 05 May  
495 2017.
- 496 26. Charan J & Biswas T. How to calculate sample size for different study designs in medical research? *Indian J*  
497 *Psychol Med*. 2013;35:121-126
- 498 27. World Medical Association. World Medical Association Declaration of Helsinki Ethical Principles for Medical  
499 Research Involving Human Subjects. *JAMA*. 2013;310:2191–2194.
- 500 28. European Medicines Agency. ICH Topic E6 (R1) Guideline for good clinical practice step 5 note for guidance  
501 on good clinical practice. (CPMP/ICH/135/95). 2002.
- 502 29. Philippine Health Research Ethics Board. National Ethical Guidelines for Health Research. Taguig City:  
503 PNHRs; 2011.
- 504 30. Beckman H, Hawley S & Bishop T. Application of theory-based health behavior change techniques to the  
505 prevention of obesity in children. *J Pediatr Nurs*. 20016;21:266–275
- 506 31. Parks W & Lloyd L. Planning social mobilization and communication for dengue fever prevention and  
507 control: a step-by-step guide. Geneva, Switzerland; WHO; 2004

- 508 32. Korin MR. Theory and fundamentals of health promotion for children and adolescents. In: Korin M. ed.  
509 Health promotion for children and adolescents. Springer, Boston, MA; 2016
- 510 33. Elder J & Lloyd L. Working paper 7.3: Achieving behaviour change for dengue control: methods, scaling-up  
511 and sustainability. In: Scientific Working Group Report on Dengue: Meeting Report, 1-5 October 2006.  
512 Geneva, Switzerland: WHO; 2007
- 513 34. Piko BF & Bak J. Children's perceptions of health and illness: images and lay concepts in preadolescence.  
514 Health Educ Res. 2006;21:643–653
- 515 35. Woods SE, Springett J, Porcellato L & Dugdill L. 'Stop it, it's bad for you and me': experiences of and views  
516 on passive smoking among primary-school children in Liverpool. Health Educ Res. 2005;20:645-55
- 517 36. Bonn M. The effects of hospitalization on children: a review. Curationis 1994;17:20–24
- 518 37. Coyne I. Children's experiences of hospitalization. J Child Health Care. 2006;10:326–36
- 519 38. Wolraich M, Felice ME, Drotar D. The classification of child and adolescent mental diagnoses in primary  
520 care: diagnostic and statistical manual for primary care (DSM-PC) child and adolescent version. Elk Grove  
521 Village, IL.: American Academy of Pediatrics; 1996.
- 522 39. Diaz-Caneja A, Gledhill J, Weaver T, Nadel S, Garralda E. A child's admission to hospital: a qualitative study  
523 examining the experiences of parents. Intensive Care Med. 2005;31:1248–54
- 524 40. Pao M & Bosk A. Anxiety in medically ill children and adolescents. *Depress Anxiety*. 2011;28:40–49
- 525 41. Bsiri-Moghaddam K, Basiri-Moghaddam M, Sadeghmoghaddam L & Ahmadi F. The concept of  
526 hospitalization of children from the view point of parents and children. *Iran J Pediatr*. 2011;21:201-8
- 527 42. Ong WT. Deadly dengue: Prevention, treatment, and 'Tawa Tawa'. PCHRD;2014
- 528 43. Angström-Brännström C, Norberg A, Jansson L. Narratives of children with chronic illness about being  
529 comforted. *J Pediatr Nurs*. 2008;23:310-316
- 530 44. Huang HW, Tseng HC, Lee CH, Chuang HY & Lin SH. Clinical significance of skin rash in dengue fever: A focus  
531 on discomfort, complications, and disease outcome. *Asian Pac J Trop Med*. 2016;9:713–718
- 532 45. Roche B, Gaillard B, Leger L, Pelagie-Moutenda R, Sochacki T, et al. An ecological and digital epidemiology  
533 analysis on the role of human behavior on the 2014 Chikungunya outbreak in Martinique. *Sci. Rep*. 2017;7:  
534 1-8
- 535 46. Nguyen QC, Brunisholz KD, Yu W, McCullough M, Hanson HA, et al. Twitter-derived neighborhood  
536 characteristics associated with obesity and diabetes. *Sci. Rep*. 2017;7:1-10

- 537 47. Lwin MO, Vijaykumaor S, Foo S, Fernand ON, Lim G, et al. Social media-based civic engagement solutions  
538 for dengue prevention in Sri Lanka: results of receptivity assessment. *Health Educ Res.* 2016;31:1–11
- 539 48. Noreen M, Arijio AG, Ahmad L, Sethar A, Leghari MF, et al. Biological control of mosquito larvae using edible  
540 fish. *Int. J. of Inov. and App. Res.* 2017;5:1-6
- 541 49. Phukon HK & Biswas SP. An investigation on larvicidal efficacy of some indigenous fish species of Assam,  
542 India. *Adv. Biores.* 2013;4:22-25
- 543 50. World Health Organization. Comprehensive guidelines for prevention and control of dengue and dengue  
544 haemorrhagic fever. WHO, Regional Office for South-East Asia; 2011  
545 [http://www.searo.who.int/entity/vector\\_borne\\_tropical\\_diseases/documents/SEAROTPS60/en/](http://www.searo.who.int/entity/vector_borne_tropical_diseases/documents/SEAROTPS60/en/)

## 546 **Figure Legends**

547 **Fig. 1 Independent t-test results for the difference of knowledge, attitude and practices domains mean**  
548 **scores among paediatric and adult patients with DF and youth and adult controls.** PP = Paediatric Patients,  
549 AP = Adult Patients, YC = Youth Controls, AC = Adult Controls; \*p < 0.05; \*\*p < 0.01; \*\*\*p < 0.001
